# Supplementary material
Source: publisher figshare collection journal article supplement (https://gsajournals.figshare.com/ndownloader/files/15041639)
Supplement: Supplementary file 1 [file 15041639]

## Sheet: All Mutants
Table S2. Differential expression in all mutants GO analysis
(a) Background set is all ORFs identified during RNA seq
(b) Target set identified by genes with |log2(Fold Change)| > 0.585 and p-value < 0.01 in all mutants
(c) GO enrichment from GOrilla with p-value < 10E-3 and FDR < 0.05
Background Set (a)		Target Set (b)	log2FC dig1D	log2FC ste12D	log2FC ras2D	log2FC rtg3D	log2FC spt8D	p-value dig1D	p-value ste12D	p-value ras2D	p-value rtg3D	p-value spt8D		Enriched GO terms (c)	Description	P-value	FDR q-value	Enrichment	N	B	n	b	Genes
15S_rRNA		YBR296C	5.036	4.97007	1.87564	-1.83951	3.89606	2.72e-37	2.75e-36	2.99e-06	0.000162165	7.75e-23		GO:0043708	cell adhesion involved in biofilm formation	0.000243	0.638	77.08	5550	4	36	2	[NRG2 - nrg2p, FLO11 - flo11p]
21S_rRNA		YOL154W	4.77119	-0.930106	-2.37998	-2.68857	-1.83499	9.21e-48	0.00614566	5.87e-12	1.48e-14	9.4e-08		GO:0005199	structural constituent of cell wall	9.14e-07	0.00228	26.58	5550	29	36	5	[TIR4 - tir4p, PAU7 - pau7p, TIR1 - tir1p, PAU23 - pau23p, PAU17 - pau17p]
HRA1		YJR153W	3.7097	-3.76629	-2.52616	-2.81536	-1.87031	2.6e-190	6.39e-55	5.25e-55	8.69e-63	3.08e-33		GO:0005576	extracellular region	1.02e-09	1.08e-06	14.02	5550	110	36	10	[ZPS1 - zps1p, TIR4 - tir4p, TIR1 - tir1p, YLR040C - hypothetical protein, PAU23 - pau23p, PGU1 - pgu1p, FLO11 - flo11p, SUC2 - beta-fructofuranosidase suc2, DSE4 - dse4p, YLR042C - hypothetical protein]
ICR1		YGL255W	3.17983	1.093	-2.67039	-2.86144	-1.77371	7.94e-21	0.00132268	1.2e-14	1.62e-16	2.54e-07		GO:0030312	external encapsulating structure	2.42e-09	1.28e-06	12.85	5550	120	36	10	[ZPS1 - zps1p, TIR4 - tir4p, PAU7 - pau7p, TIR1 - tir1p, YLR040C - hypothetical protein, PAU23 - pau23p, PAU17 - pau17p, FLO11 - flo11p, DSE4 - dse4p, YLR042C - hypothetical protein]
LSR1		YLL025W	3.02974	0.681985	2.3359	-1.20917	-1.03129	1.61e-48	0.00572609	4.67e-29	3.29e-05	0.000658958		GO:0005618	cell wall	2.42e-09	8.54e-07	12.85	5550	120	36	10	[ZPS1 - zps1p, TIR4 - tir4p, PAU7 - pau7p, TIR1 - tir1p, YLR040C - hypothetical protein, PAU23 - pau23p, PAU17 - pau17p, FLO11 - flo11p, DSE4 - dse4p, YLR042C - hypothetical protein]
NME1		YFL020C	2.44982	0.620714	1.34032	1.45502	1.52616	8.79e-47	0.000489267	6.36e-15	2.3e-17	8.37e-19		GO:0009277	fungal-type cell wall	3.27e-08	8.64e-06	11.96	5550	116	36	9	[ZPS1 - zps1p, TIR4 - tir4p, PAU7 - pau7p, TIR1 - tir1p, YLR040C - hypothetical protein, PAU23 - pau23p, PAU17 - pau17p, DSE4 - dse4p, YLR042C - hypothetical protein]
Q0050		YML058W-A	2.27508	2.19247	2.6986	1.77636	3.84527	5.24e-13	9.09e-12	2e-18	1.96e-08	1.23e-36		GO:0031225	anchored component of membrane	3.02e-06	0.000638	14.23	5550	65	36	6	[TIR4 - tir4p, TIR1 - tir1p, YLR040C - hypothetical protein, FLO11 - flo11p, YHR214W - hypothetical protein, YLR042C - hypothetical protein]
Q0055		YLR037C	2.0546	1.15312	1.78929	1.62625	1.49388	1.14e-09	0.00100203	1.07e-07	1.46e-06	1.22e-05		GO:0000322	storage vacuole	3.7e-06	0.000651	5.93	5550	260	36	10	[FRE3 - fre3p, ZPS1 - zps1p, TIR4 - tir4p, TIR1 - tir1p, PAU23 - pau23p, FLO11 - flo11p, PAU17 - pau17p, SUC2 - beta-fructofuranosidase suc2, YLR042C - hypothetical protein, IZH4 - izh4p]
Q0275		YJL105W	1.86256	1.48936	1.76668	1.59154	1.70362	1.25e-18	2e-11	2.44e-17	3.57e-14	1.24e-15		GO:0000324	fungal-type vacuole	3.7e-06	0.000558	5.93	5550	260	36	10	[FRE3 - fre3p, ZPS1 - zps1p, TIR4 - tir4p, TIR1 - tir1p, PAU23 - pau23p, FLO11 - flo11p, PAU17 - pau17p, SUC2 - beta-fructofuranosidase suc2, YLR042C - hypothetical protein, IZH4 - izh4p]
RNA170		YBR066C	1.68638	1.15126	0.880316	0.793029	1.06921	1.47e-24	1.41e-11	1.34e-07	2.16e-06	1.96e-10		GO:0000323	lytic vacuole	4.1e-06	0.000541	5.86	5550	263	36	10	[FRE3 - fre3p, ZPS1 - zps1p, TIR4 - tir4p, TIR1 - tir1p, PAU23 - pau23p, FLO11 - flo11p, PAU17 - pau17p, SUC2 - beta-fructofuranosidase suc2, YLR042C - hypothetical protein, IZH4 - izh4p]
RPR1		YOR237W	1.67156	2.32764	1.67464	1.70512	2.29698	7.62e-15	1.62e-27	4.74e-15	1.46e-15	4.33e-27		GO:0071944	cell periphery	3.5e-05	0.00411	5.22	5550	266	36	9	[ZPS1 - zps1p, TIR4 - tir4p, PDR11 - atp-binding cassette multidrug transporter pdr11, TIR1 - tir1p, YLR040C - hypothetical protein, ZRT1 - high-affinity zn(2+) transporter zrt1, SUC2 - beta-fructofuranosidase suc2, YLR042C - hypothetical protein, ATO3 - ato3p]
RUF20		YIL162W	1.61379	-0.956225	-3.21076	-3.6149	-1.53952	6.09e-08	0.0013761	1.28e-26	4.16e-33	2.62e-07		GO:0005773	vacuole	0.000116	0.0123	3.99	5550	386	36	10	[FRE3 - fre3p, ZPS1 - zps1p, TIR4 - tir4p, TIR1 - tir1p, PAU23 - pau23p, PAU17 - pau17p, FLO11 - flo11p, SUC2 - beta-fructofuranosidase suc2, YLR042C - hypothetical protein, IZH4 - izh4p]
RUF21		YIL013C	1.60451	0.839127	0.901826	0.768824	0.939949	9.44e-49	1.9e-13	2.93e-16	3.83e-12	3.47e-17
RUF23		YPL272C	1.54489	1.55308	1.46314	2.08458	1.91463	1.06e-10	9.12e-11	9.14e-10	2.34e-18	1.09e-15
SCR1		YLR042C	1.4815	-7.49816	-0.775008	-1.45345	-0.747682	3.11e-24	2.05e-50	1.98e-07	8.54e-22	6.34e-07
snR10		YOR009W	1.4378	1.84208	1.53677	0.615834	1.12688	3.8e-12	5.74e-19	1.11e-13	0.00295803	5.33e-08
snR11		YPR145C-A	1.32541	2.8376	1.49532	2.09549	2.01794	0.00135231	2.66e-13	0.000176005	6.29e-08	3.3e-07
snR128		YHR214W	1.17282	-1.47273	-2.08186	-3.54717	0.701248	3.69e-06	8.13e-06	8.87e-11	7.29e-17	0.00652817
snR17a		YDR384C	1.10851	-0.672829	-1.2189	-2.98157	-1.47583	9.87e-18	4.87e-07	4.6e-20	1.71e-95	1.19e-27
snR17b		YLR040C	1.10556	-3.01781	-0.844617	-1.00414	-0.672371	5.95e-10	2.54e-33	5.71e-06	8.37e-08	0.000341646
snR189		YOL101C	1.10486	1.11796	0.75028	1.19244	1.68309	1.92e-15	2.19e-15	6.62e-08	3.62e-18	9.19e-35
snR19		YIR019C	1.08442	-2.29724	-1.25951	-4.56358	-3.09142	3.73e-16	2.01e-66	3.17e-21	5.77e-254	1.46e-118
snR190		YEL071W	0.877623	0.930494	-0.633588	-2.20166	1.48491	0.000120656	4.65e-05	0.00571267	3.06e-21	7.34e-11
snR191		YER011W	0.811305	1.64174	1.35688	-4.92248	1.00687	0.0015348	1.43e-10	1.15e-07	2.91e-75	8.41e-05
snR3		YGR180C	0.726849	0.83476	1.15571	0.712677	0.859065	2.29e-13	5.43e-17	5.56e-32	5e-13	3.83e-18
snR30		YKL201C	0.607251	0.671413	0.817279	0.883185	0.933501	0.000709691	0.000232171	3.13e-06	4.43e-07	1.29e-07
snR31		YOR315W	0.58862	-1.30079	-0.893048	-0.882654	-0.834524	0.000242082	5.22e-14	5.29e-08	7.4e-08	4.78e-07
snR32		YOL077W-A	-0.636967	-0.594291	-1.15669	-0.808576	-1.34867	0.000101425	0.00039339	2.53e-12	5.86e-07	4.63e-15
snR33		YPL223C	-0.670585	-0.58832	0.869208	-1.44497	-2.94896	0.0014678	0.00530898	3.52e-05	7.65e-12	4.77e-43
snR34		YLR420W	-0.746664	-0.885522	-1.06955	-0.668243	-0.647875	3.84e-09	1.25e-11	2.58e-17	7.46e-08	2.73e-07
snR35		YLR164W	-0.799831	-0.954747	0.634421	-1.58279	-2.13708	0.000806867	0.000105478	0.00513754	8.28e-11	3.32e-16
snR37		YNR034W-A	-1.37099	0.88859	-0.77492	1.1567	-2.06447	1.31e-06	0.00155267	0.00592639	3.68e-05	4.69e-13
snR4		YNR067C	-1.44806	1.59392	0.815394	1.0557	-0.612458	7.53e-11	9.44e-19	6.08e-06	3.56e-09	0.00231266
snR40		YDL218W	-1.53427	-2.04178	3.30504	-0.919918	-3.40946	1.19e-07	3.82e-11	3.12e-35	0.00094206	3.42e-23
snR41		YOR381W	-1.55608	-2.14428	-1.63459	-2.06168	-2.31891	0.00108153	8.04e-06	0.000583226	1.51e-05	1.29e-06
snR42		YOL143C	-1.61318	-2.08341	-1.92322	-0.785934	-1.78039	4.38e-29	4.67e-44	8.25e-41	2.05e-08	9.91e-35
snR43
snR44
snR45
snR46
snR49
snR5
snR63
snR68
snR7-L
snR70
snR8
snR81
snR82
snR83
snR84
snR85
snR86
snR87
snR9
SRG1
tG(CCC)O
TLC1
tX(XXX)D
YAL001C
YAL002W
YAL003W
YAL005C
YAL007C
YAL008W
YAL009W
YAL010C
YAL011W
YAL012W
YAL013W
YAL014C
YAL015C
YAL016C-A
YAL016W
YAL017W
YAL018C
YAL019W
YAL019W-A
YAL020C
YAL021C
YAL022C
YAL023C
YAL024C
YAL025C
YAL026C
YAL026C-A
YAL027W
YAL028W
YAL029C
YAL030W
YAL031C
YAL031W-A
YAL032C
YAL033W
YAL034C
YAL034C-B
YAL034W-A
YAL035W
YAL036C
YAL037C-B
YAL037W
YAL038W
YAL039C
YAL040C
YAL041W
YAL042C-A
YAL042W
YAL043C
YAL044C
YAL044W-A
YAL045C
YAL046C
YAL047C
YAL047W-A
YAL048C
YAL049C
YAL051W
YAL053W
YAL054C
YAL055W
YAL056C-A
YAL056W
YAL058W
YAL059W
YAL060W
YAL061W
YAL062W
YAL063C
YAL064W-B
YAL065C
YAL067C
YAL068C
YAR002C-A
YAR002W
YAR003W
YAR007C
YAR008W
YAR009C
YAR010C
YAR014C
YAR015W
YAR018C
YAR019C
YAR020C
YAR023C
YAR027W
YAR028W
YAR029W
YAR030C
YAR031W
YAR033W
YAR035W
YAR042W
YAR050W
YAR066W
YAR068W
YAR070C
YAR071W
YAR073W
YBL001C
YBL002W
YBL003C
YBL004W
YBL005W
YBL005W-B
YBL006C
YBL007C
YBL008W
YBL009W
YBL010C
YBL011W
YBL012C
YBL013W
YBL014C
YBL015W
YBL016W
YBL017C
YBL018C
YBL019W
YBL020W
YBL021C
YBL022C
YBL023C
YBL024W
YBL025W
YBL026W
YBL027W
YBL028C
YBL029C-A
YBL029W
YBL030C
YBL031W
YBL032W
YBL033C
YBL034C
YBL035C
YBL036C
YBL037W
YBL038W
YBL039C
YBL039W-B
YBL040C
YBL041W
YBL042C
YBL043W
YBL044W
YBL045C
YBL046W
YBL047C
YBL048W
YBL049W
YBL050W
YBL051C
YBL052C
YBL053W
YBL054W
YBL055C
YBL056W
YBL057C
YBL058W
YBL059C-A
YBL059W
YBL060W
YBL061C
YBL063W
YBL064C
YBL065W
YBL066C
YBL067C
YBL068W
YBL069W
YBL070C
YBL071C
YBL071W-A
YBL072C
YBL073W
YBL074C
YBL075C
YBL076C
YBL077W
YBL078C
YBL079W
YBL080C
YBL081W
YBL082C
YBL083C
YBL084C
YBL085W
YBL086C
YBL087C
YBL088C
YBL089W
YBL090W
YBL091C
YBL091C-A
YBL092W
YBL093C
YBL095W
YBL096C
YBL097W
YBL098W
YBL099W
YBL100C
YBL100W-B
YBL101C
YBL102W
YBL103C
YBL104C
YBL105C
YBL106C
YBL107C
YBL109W
YBL113C
YBR001C
YBR002C
YBR003W
YBR004C
YBR005W
YBR006W
YBR007C
YBR008C
YBR009C
YBR010W
YBR011C
YBR012C
YBR012W-B
YBR013C
YBR014C
YBR015C
YBR016W
YBR017C
YBR018C
YBR019C
YBR020W
YBR021W
YBR022W
YBR023C
YBR024W
YBR025C
YBR026C
YBR028C
YBR029C
YBR030W
YBR031W
YBR032W
YBR033W
YBR034C
YBR035C
YBR036C
YBR037C
YBR038W
YBR039W
YBR040W
YBR041W
YBR042C
YBR043C
YBR044C
YBR045C
YBR046C
YBR047W
YBR048W
YBR049C
YBR050C
YBR051W
YBR052C
YBR053C
YBR054W
YBR055C
YBR056W
YBR056W-A
YBR057C
YBR058C
YBR058C-A
YBR059C
YBR060C
YBR061C
YBR062C
YBR063C
YBR065C
YBR066C
YBR067C
YBR068C
YBR069C
YBR070C
YBR071W
YBR072W
YBR073W
YBR074W
YBR076C-A
YBR076W
YBR077C
YBR078W
YBR079C
YBR080C
YBR081C
YBR082C
YBR083W
YBR084C-A
YBR084W
YBR085C-A
YBR085W
YBR086C
YBR087W
YBR088C
YBR089C-A
YBR089W
YBR090C
YBR091C
YBR092C
YBR093C
YBR094W
YBR095C
YBR096W
YBR097W
YBR098W
YBR101C
YBR102C
YBR103W
YBR104W
YBR105C
YBR106W
YBR107C
YBR108W
YBR109C
YBR109W-A
YBR110W
YBR111C
YBR111W-A
YBR112C
YBR113W
YBR114W
YBR115C
YBR116C
YBR117C
YBR118W
YBR119W
YBR120C
YBR121C
YBR122C
YBR123C
YBR124W
YBR125C
YBR126C
YBR126W-A
YBR126W-B
YBR127C
YBR128C
YBR129C
YBR130C
YBR131W
YBR132C
YBR133C
YBR134W
YBR135W
YBR136W
YBR137W
YBR138C
YBR139W
YBR140C
YBR141C
YBR142W
YBR143C
YBR145W
YBR146W
YBR147W
YBR148W
YBR149W
YBR150C
YBR151W
YBR152W
YBR153W
YBR154C
YBR155W
YBR156C
YBR157C
YBR158W
YBR159W
YBR160W
YBR161W
YBR162C
YBR162W-A
YBR163W
YBR164C
YBR165W
YBR166C
YBR167C
YBR168W
YBR169C
YBR170C
YBR171W
YBR172C
YBR173C
YBR174C
YBR175W
YBR176W
YBR177C
YBR178W
YBR179C
YBR180W
YBR181C
YBR182C
YBR183W
YBR184W
YBR185C
YBR186W
YBR187W
YBR188C
YBR189W
YBR190W
YBR191W
YBR192W
YBR193C
YBR194W
YBR195C
YBR196C
YBR197C
YBR198C
YBR199W
YBR200W
YBR200W-A
YBR201C-A
YBR201W
YBR202W
YBR203W
YBR204C
YBR205W
YBR206W
YBR207W
YBR208C
YBR209W
YBR210W
YBR211C
YBR212W
YBR213W
YBR214W
YBR215W
YBR216C
YBR217W
YBR218C
YBR220C
YBR221C
YBR222C
YBR223C
YBR224W
YBR225W
YBR226C
YBR227C
YBR228W
YBR229C
YBR230C
YBR230W-A
YBR231C
YBR232C
YBR233W
YBR233W-A
YBR234C
YBR235W
YBR236C
YBR237W
YBR238C
YBR239C
YBR240C
YBR241C
YBR242W
YBR243C
YBR244W
YBR245C
YBR246W
YBR247C
YBR248C
YBR249C
YBR250W
YBR251W
YBR252W
YBR253W
YBR254C
YBR255C-A
YBR255W
YBR256C
YBR257W
YBR258C
YBR259W
YBR260C
YBR261C
YBR262C
YBR263W
YBR264C
YBR265W
YBR267W
YBR268W
YBR269C
YBR270C
YBR271W
YBR272C
YBR273C
YBR274W
YBR275C
YBR276C
YBR277C
YBR278W
YBR279W
YBR280C
YBR281C
YBR282W
YBR283C
YBR284W
YBR285W
YBR286W
YBR287W
YBR288C
YBR289W
YBR290W
YBR291C
YBR292C
YBR293W
YBR294W
YBR295W
YBR296C
YBR296C-A
YBR297W
YBR298C
YBR301W
YCL001W
YCL001W-A
YCL001W-B
YCL002C
YCL004W
YCL005W
YCL005W-A
YCL007C
YCL008C
YCL009C
YCL010C
YCL011C
YCL012C
YCL014W
YCL016C
YCL017C
YCL018W
YCL019W
YCL021W-A
YCL023C
YCL024W
YCL025C
YCL026C-A
YCL026C-B
YCL027W
YCL028W
YCL029C
YCL030C
YCL031C
YCL032W
YCL033C
YCL034W
YCL035C
YCL036W
YCL037C
YCL038C
YCL039W
YCL040W
YCL041C
YCL042W
YCL043C
YCL044C
YCL045C
YCL046W
YCL047C
YCL048W
YCL048W-A
YCL049C
YCL050C
YCL051W
YCL052C
YCL054W
YCL055W
YCL056C
YCL057C-A
YCL057W
YCL058C
YCL059C
YCL061C
YCL063W
YCL064C
YCL069W
YCL073C
YCR001W
YCR002C
YCR003W
YCR004C
YCR005C
YCR006C
YCR007C
YCR008W
YCR009C
YCR010C
YCR011C
YCR012W
YCR013C
YCR014C
YCR015C
YCR016W
YCR017C
YCR018C
YCR018C-A
YCR019W
YCR020C
YCR020C-A
YCR020W-B
YCR021C
YCR022C
YCR023C
YCR024C
YCR024C-A
YCR024C-B
YCR025C
YCR026C
YCR027C
YCR028C
YCR028C-A
YCR030C
YCR031C
YCR032W
YCR033W
YCR034W
YCR035C
YCR036W
YCR037C
YCR038C
YCR041W
YCR042C
YCR043C
YCR044C
YCR045C
YCR046C
YCR047C
YCR048W
YCR049C
YCR050C
YCR051W
YCR052W
YCR053W
YCR054C
YCR057C
YCR059C
YCR060W
YCR061W
YCR063W
YCR064C
YCR065W
YCR066W
YCR067C
YCR068W
YCR069W
YCR071C
YCR072C
YCR073C
YCR073W-A
YCR075C
YCR075W-A
YCR076C
YCR077C
YCR079W
YCR081W
YCR082W
YCR083W
YCR084C
YCR085W
YCR086W
YCR087W
YCR088W
YCR089W
YCR090C
YCR091W
YCR092C
YCR093W
YCR094W
YCR095C
YCR097W
YCR098C
YCR099C
YCR100C
YCR101C
YCR102C
YCR104W
YCR105W
YCR106W
YCR107W
YDL001W
YDL002C
YDL003W
YDL004W
YDL005C
YDL006W
YDL007W
YDL008W
YDL009C
YDL010W
YDL011C
YDL012C
YDL013W
YDL014W
YDL015C
YDL016C
YDL017W
YDL018C
YDL019C
YDL020C
YDL021W
YDL022C-A
YDL022W
YDL023C
YDL024C
YDL025C
YDL026W
YDL027C
YDL028C
YDL029W
YDL030W
YDL031W
YDL032W
YDL033C
YDL034W
YDL035C
YDL036C
YDL037C
YDL039C
YDL040C
YDL042C
YDL043C
YDL044C
YDL045C
YDL045W-A
YDL046W
YDL047W
YDL048C
YDL049C
YDL050C
YDL051W
YDL052C
YDL053C
YDL054C
YDL055C
YDL056W
YDL057W
YDL058W
YDL059C
YDL060W
YDL061C
YDL062W
YDL063C
YDL064W
YDL065C
YDL066W
YDL067C
YDL068W
YDL069C
YDL070W
YDL071C
YDL072C
YDL073W
YDL074C
YDL075W
YDL076C
YDL077C
YDL078C
YDL079C
YDL080C
YDL081C
YDL082W
YDL083C
YDL084W
YDL085C-A
YDL085W
YDL086W
YDL087C
YDL088C
YDL089W
YDL090C
YDL091C
YDL092W
YDL093W
YDL094C
YDL095W
YDL096C
YDL097C
YDL098C
YDL099W
YDL100C
YDL101C
YDL102W
YDL103C
YDL104C
YDL105W
YDL106C
YDL107W
YDL108W
YDL109C
YDL110C
YDL111C
YDL112W
YDL113C
YDL114W
YDL115C
YDL116W
YDL117W
YDL118W
YDL119C
YDL120W
YDL121C
YDL122W
YDL123W
YDL124W
YDL125C
YDL126C
YDL127W
YDL128W
YDL129W
YDL130W
YDL130W-A
YDL131W
YDL132W
YDL133C-A
YDL133W
YDL134C
YDL135C
YDL136W
YDL137W
YDL138W
YDL139C
YDL140C
YDL141W
YDL142C
YDL143W
YDL144C
YDL145C
YDL146W
YDL147W
YDL148C
YDL149W
YDL150W
YDL151C
YDL152W
YDL153C
YDL154W
YDL155W
YDL156W
YDL157C
YDL158C
YDL159W
YDL160C
YDL160C-A
YDL161W
YDL164C
YDL165W
YDL166C
YDL167C
YDL168W
YDL169C
YDL170W
YDL171C
YDL173W
YDL174C
YDL175C
YDL176W
YDL177C
YDL178W
YDL179W
YDL180W
YDL181W
YDL182W
YDL183C
YDL184C
YDL185C-A
YDL185W
YDL186W
YDL187C
YDL188C
YDL189W
YDL190C
YDL191W
YDL192W
YDL193W
YDL194W
YDL195W
YDL197C
YDL198C
YDL199C
YDL200C
YDL201W
YDL202W
YDL203C
YDL204W
YDL205C
YDL206W
YDL207W
YDL208W
YDL209C
YDL210W
YDL211C
YDL212W
YDL213C
YDL214C
YDL215C
YDL216C
YDL217C
YDL218W
YDL219W
YDL220C
YDL221W
YDL222C
YDL223C
YDL224C
YDL225W
YDL226C
YDL227C
YDL228C
YDL229W
YDL230W
YDL231C
YDL232W
YDL233W
YDL234C
YDL235C
YDL236W
YDL237W
YDL238C
YDL239C
YDL240W
YDL241W
YDL242W
YDL243C
YDL244W
YDL245C
YDL246C
YDL247W
YDL248W
YDR001C
YDR002W
YDR003W
YDR003W-A
YDR004W
YDR005C
YDR006C
YDR007W
YDR008C
YDR009W
YDR010C
YDR011W
YDR012W
YDR013W
YDR014W
YDR014W-A
YDR016C
YDR017C
YDR018C
YDR019C
YDR020C
YDR021W
YDR022C
YDR023W
YDR025W
YDR026C
YDR027C
YDR028C
YDR029W
YDR030C
YDR031W
YDR032C
YDR033W
YDR034C
YDR034C-A
YDR034C-D
YDR034W-B
YDR035W
YDR036C
YDR037W
YDR038C
YDR040C
YDR041W
YDR042C
YDR043C
YDR044W
YDR045C
YDR046C
YDR047W
YDR048C
YDR049W
YDR050C
YDR051C
YDR052C
YDR053W
YDR054C
YDR055W
YDR056C
YDR057W
YDR058C
YDR059C
YDR060W
YDR061W
YDR062W
YDR063W
YDR064W
YDR065W
YDR066C
YDR067C
YDR068W
YDR069C
YDR070C
YDR071C
YDR072C
YDR073W
YDR074W
YDR075W
YDR076W
YDR077W
YDR078C
YDR079C-A
YDR079W
YDR080W
YDR081C
YDR082W
YDR083W
YDR084C
YDR085C
YDR086C
YDR087C
YDR088C
YDR089W
YDR090C
YDR091C
YDR092W
YDR093W
YDR094W
YDR096W
YDR097C
YDR098C
YDR099W
YDR100W
YDR101C
YDR103W
YDR104C
YDR105C
YDR106W
YDR107C
YDR108W
YDR109C
YDR110W
YDR111C
YDR112W
YDR113C
YDR114C
YDR115W
YDR116C
YDR117C
YDR118W
YDR119W
YDR119W-A
YDR120C
YDR121W
YDR122W
YDR123C
YDR124W
YDR125C
YDR126W
YDR127W
YDR128W
YDR129C
YDR130C
YDR131C
YDR132C
YDR133C
YDR134C
YDR135C
YDR136C
YDR137W
YDR138W
YDR139C
YDR140W
YDR141C
YDR142C
YDR143C
YDR144C
YDR145W
YDR146C
YDR147W
YDR148C
YDR149C
YDR150W
YDR151C
YDR152W
YDR153C
YDR154C
YDR155C
YDR156W
YDR157W
YDR158W
YDR159W
YDR160W
YDR161W
YDR162C
YDR163W
YDR164C
YDR165W
YDR166C
YDR167W
YDR168W
YDR169C
YDR170C
YDR170W-A
YDR171W
YDR172W
YDR173C
YDR174W
YDR175C
YDR176W
YDR177W
YDR178W
YDR179C
YDR179W-A
YDR180W
YDR181C
YDR182W
YDR182W-A
YDR183C-A
YDR183W
YDR184C
YDR185C
YDR186C
YDR187C
YDR188W
YDR189W
YDR190C
YDR191W
YDR192C
YDR193W
YDR194C
YDR195W
YDR196C
YDR197W
YDR198C
YDR199W
YDR200C
YDR201W
YDR202C
YDR203W
YDR204W
YDR205W
YDR206W
YDR207C
YDR208W
YDR209C
YDR210C-D
YDR210W-B
YDR211W
YDR212W
YDR213W
YDR214W
YDR215C
YDR216W
YDR217C
YDR218C
YDR219C
YDR221W
YDR222W
YDR223W
YDR224C
YDR225W
YDR226W
YDR227W
YDR228C
YDR229W
YDR230W
YDR231C
YDR232W
YDR233C
YDR234W
YDR235W
YDR236C
YDR237W
YDR238C
YDR239C
YDR240C
YDR242W
YDR243C
YDR244W
YDR245W
YDR246W
YDR246W-A
YDR247W
YDR248C
YDR249C
YDR251W
YDR252W
YDR253C
YDR254W
YDR255C
YDR256C
YDR257C
YDR258C
YDR259C
YDR260C
YDR261C
YDR261C-D
YDR261W-A
YDR261W-B
YDR262W
YDR263C
YDR264C
YDR265W
YDR266C
YDR267C
YDR268W
YDR269C
YDR270W
YDR271C
YDR272W
YDR273W
YDR274C
YDR275W
YDR276C
YDR277C
YDR279W
YDR280W
YDR281C
YDR282C
YDR283C
YDR284C
YDR285W
YDR286C
YDR287W
YDR288W
YDR289C
YDR290W
YDR291W
YDR292C
YDR293C
YDR294C
YDR295C
YDR296W
YDR297W
YDR298C
YDR299W
YDR300C
YDR301W
YDR302W
YDR303C
YDR304C
YDR305C
YDR306C
YDR307W
YDR308C
YDR309C
YDR310C
YDR311W
YDR312W
YDR313C
YDR314C
YDR315C
YDR316W
YDR317W
YDR318W
YDR319C
YDR320C
YDR320C-A
YDR321W
YDR322C-A
YDR322W
YDR323C
YDR324C
YDR325W
YDR326C
YDR327W
YDR328C
YDR329C
YDR330W
YDR331W
YDR332W
YDR333C
YDR334W
YDR335W
YDR336W
YDR337W
YDR338C
YDR339C
YDR340W
YDR341C
YDR342C
YDR343C
YDR344C
YDR345C
YDR346C
YDR347W
YDR348C
YDR349C
YDR350C
YDR351W
YDR352W
YDR353W
YDR354W
YDR355C
YDR356W
YDR357C
YDR358W
YDR359C
YDR360W
YDR361C
YDR362C
YDR363W
YDR363W-A
YDR364C
YDR365C
YDR365W-B
YDR366C
YDR367W
YDR368W
YDR369C
YDR370C
YDR371W
YDR372C
YDR373W
YDR374C
YDR374W-A
YDR375C
YDR376W
YDR377W
YDR378C
YDR379C-A
YDR379W
YDR380W
YDR381C-A
YDR381W
YDR382W
YDR383C
YDR384C
YDR385W
YDR386W
YDR387C
YDR388W
YDR389W
YDR390C
YDR391C
YDR392W
YDR393W
YDR394W
YDR395W
YDR396W
YDR397C
YDR398W
YDR399W
YDR400W
YDR402C
YDR403W
YDR404C
YDR405W
YDR406W
YDR407C
YDR408C
YDR409W
YDR410C
YDR411C
YDR412W
YDR413C
YDR414C
YDR415C
YDR416W
YDR417C
YDR418W
YDR419W
YDR420W
YDR421W
YDR422C
YDR423C
YDR424C
YDR425W
YDR426C
YDR427W
YDR428C
YDR429C
YDR430C
YDR431W
YDR432W
YDR433W
YDR434W
YDR435C
YDR436W
YDR437W
YDR438W
YDR439W
YDR440W
YDR441C
YDR442W
YDR443C
YDR444W
YDR445C
YDR446W
YDR447C
YDR448W
YDR449C
YDR450W
YDR451C
YDR452W
YDR453C
YDR454C
YDR455C
YDR456W
YDR457W
YDR458C
YDR459C
YDR460W
YDR461C-A
YDR461W
YDR462W
YDR463W
YDR464W
YDR465C
YDR466W
YDR467C
YDR468C
YDR469W
YDR470C
YDR471W
YDR472W
YDR473C
YDR475C
YDR476C
YDR477W
YDR478W
YDR479C
YDR480W
YDR481C
YDR482C
YDR483W
YDR484W
YDR485C
YDR486C
YDR487C
YDR488C
YDR489W
YDR490C
YDR491C
YDR492W
YDR493W
YDR494W
YDR495C
YDR496C
YDR497C
YDR498C
YDR499W
YDR500C
YDR501W
YDR502C
YDR503C
YDR504C
YDR505C
YDR506C
YDR507C
YDR508C
YDR509W
YDR510C-A
YDR510W
YDR511W
YDR512C
YDR513W
YDR514C
YDR515W
YDR516C
YDR517W
YDR518W
YDR519W
YDR520C
YDR521W
YDR522C
YDR523C
YDR524C
YDR524C-B
YDR524W-C
YDR525W
YDR525W-A
YDR526C
YDR527W
YDR528W
YDR529C
YDR530C
YDR531W
YDR532C
YDR533C
YDR534C
YDR535C
YDR536W
YDR537C
YDR538W
YDR539W
YDR540C
YDR541C
YDR543C
YDR545W
YEL001C
YEL002C
YEL003W
YEL004W
YEL005C
YEL006W
YEL007W
YEL008W
YEL009C
YEL009C-A
YEL010W
YEL011W
YEL012W
YEL013W
YEL015W
YEL016C
YEL017C-A
YEL017W
YEL018C-A
YEL018W
YEL019C
YEL020C
YEL020C-B
YEL020W-A
YEL021W
YEL022W
YEL023C
YEL024W
YEL025C
YEL026W
YEL027W
YEL028W
YEL029C
YEL030C-A
YEL030W
YEL031W
YEL032W
YEL033W
YEL034C-A
YEL035C
YEL036C
YEL037C
YEL038W
YEL039C
YEL040W
YEL041W
YEL042W
YEL043W
YEL044W
YEL045C
YEL046C
YEL047C
YEL048C
YEL049W
YEL050C
YEL050W-A
YEL051W
YEL052W
YEL053C
YEL053W-A
YEL054C
YEL055C
YEL056W
YEL057C
YEL058W
YEL059C-A
YEL059W
YEL060C
YEL061C
YEL062W
YEL063C
YEL064C
YEL065W
YEL066W
YEL067C
YEL068C
YEL069C
YEL070W
YEL071W
YEL072W
YEL073C
YEL074W
YEL075W-A
YEL076C
YEL077C
YER001W
YER002W
YER003C
YER004W
YER005W
YER006C-A
YER006W
YER007C-A
YER007W
YER008C
YER009W
YER010C
YER011W
YER012W
YER013W
YER014W
YER015W
YER016W
YER017C
YER018C
YER019C-A
YER019W
YER020W
YER021W
YER022W
YER023W
YER024W
YER025W
YER026C
YER027C
YER028C
YER029C
YER030W
YER031C
YER032W
YER033C
YER034W
YER035W
YER036C
YER037W
YER038C
YER038W-A
YER039C
YER039C-A
YER040W
YER041W
YER042W
YER043C
YER044C
YER044C-A
YER045C
YER046W
YER046W-A
YER047C
YER048C
YER048W-A
YER049W
YER050C
YER051W
YER052C
YER053C
YER053C-A
YER054C
YER055C
YER056C
YER056C-A
YER057C
YER058W
YER059W
YER060W
YER060W-A
YER061C
YER062C
YER063W
YER064C
YER065C
YER066C-A
YER066W
YER067C-A
YER067W
YER068C-A
YER068W
YER069W
YER070W
YER071C
YER072W
YER073W
YER074W
YER074W-A
YER075C
YER076C
YER076W-A
YER077C
YER078C
YER079C-A
YER079W
YER080W
YER081W
YER082C
YER083C
YER084W
YER086W
YER087C-A
YER087C-B
YER087W
YER088C
YER088C-A
YER089C
YER090W
YER091C
YER092W
YER093C
YER093C-A
YER094C
YER095W
YER096W
YER097W
YER098W
YER099C
YER100W
YER101C
YER102W
YER103W
YER104W
YER105C
YER106W
YER107C
YER107W-A
YER109C
YER110C
YER111C
YER112W
YER113C
YER114C
YER115C
YER116C
YER117W
YER118C
YER119C
YER119C-A
YER120W
YER121W
YER122C
YER123W
YER124C
YER125W
YER126C
YER127W
YER128W
YER129W
YER130C
YER131W
YER132C
YER133W
YER133W-A
YER134C
YER135C
YER136W
YER137C
YER137W-A
YER138C
YER138W-A
YER139C
YER140W
YER141W
YER142C
YER143W
YER144C
YER145C
YER145C-A
YER146W
YER147C
YER147C-A
YER148W
YER148W-A
YER149C
YER150W
YER151C
YER152C
YER152W-A
YER153C
YER154W
YER155C
YER156C
YER157W
YER158C
YER158W-A
YER159C
YER160C
YER161C
YER162C
YER163C
YER164W
YER165C-A
YER165W
YER166W
YER167W
YER168C
YER169W
YER170W
YER171W
YER172C
YER172C-A
YER173W
YER174C
YER175C
YER176W
YER177W
YER178W
YER179W
YER180C
YER180C-A
YER182W
YER183C
YER184C
YER185W
YER186C
YER187W
YER188C-A
YER188W
YER189W
YER190W
YFL001W
YFL002C
YFL003C
YFL004W
YFL005W
YFL007W
YFL008W
YFL009W
YFL010C
YFL010W-A
YFL011W
YFL012W
YFL013C
YFL013W-A
YFL014W
YFL016C
YFL017C
YFL017W-A
YFL018C
YFL019C
YFL020C
YFL021C-A
YFL021W
YFL022C
YFL023W
YFL024C
YFL025C
YFL026W
YFL027C
YFL028C
YFL029C
YFL030W
YFL031C-A
YFL031W
YFL032W
YFL033C
YFL034C-A
YFL034C-B
YFL034W
YFL036W
YFL037W
YFL038C
YFL039C
YFL040W
YFL041W
YFL041W-A
YFL042C
YFL044C
YFL045C
YFL046W
YFL047W
YFL048C
YFL049W
YFL050C
YFL051C
YFL052W
YFL053W
YFL054C
YFL055W
YFL056C
YFL057C
YFL058W
YFL062W
YFL066C
YFL067W
YFR001W
YFR002W
YFR003C
YFR004W
YFR005C
YFR006W
YFR007W
YFR008W
YFR009W
YFR010W
YFR010W-A
YFR011C
YFR012W
YFR013W
YFR014C
YFR015C
YFR016C
YFR017C
YFR018C
YFR019W
YFR020W
YFR021W
YFR022W
YFR023W
YFR024C-A
YFR025C
YFR026C
YFR027W
YFR028C
YFR029W
YFR030W
YFR031C
YFR031C-A
YFR032C
YFR032C-A
YFR032C-B
YFR033C
YFR034C
YFR035C
YFR036W
YFR036W-A
YFR037C
YFR038W
YFR039C
YFR040W
YFR041C
YFR042W
YFR043C
YFR044C
YFR045W
YFR046C
YFR047C
YFR048W
YFR049W
YFR050C
YFR051C
YFR052C-A
YFR052W
YFR053C
YFR054C
YFR055W
YFR056C
YGL001C
YGL002W
YGL003C
YGL004C
YGL005C
[truncated: 4,238 more rows]

## Sheet: RAS RTG
Table S2. Differential Expression in ras2D and rtg3D GO analysis
(a) Background set is all ORFs identified during RNA seq
(b) Target set identified by genes with |log2(Fold Change)| > 0.585 and p-value < 0.01 in ras2D and rtg3D
(c) GO enrichment from GOrilla with p-value < 10E-3 and FDR < 0.05
Background Set (a)		Target Set (b)	log2FC ras2D	log2FC rtg3D	p-value ste12D	p-value ras2D		Enriched GO terms (c)	Description	P-value	FDR q-value	Enrichment	N	B	n	b	Genes
15S_rRNA		YBR296C	1.87564	-1.83951	2.99e-06	0.000162165		GO:0017144	drug metabolic process	5.25e-13	2.75e-09	4.02	5550	245	197	35	[AGX1 - alanine--glyoxylate transaminase, ICL2 - methylisocitrate lyase icl2, ICL1 - isocitrate lyase 1, CIT2 - citrate (si)-synthase cit2, ACH1 - ach1p, AHP1 - ahp1p, PET18 - pet18p, ATP20 - atp20p, TSA2 - tsa2p, HXK2 - hexokinase 2, SDH3 - succinate dehydrogenase cytochrome b subunit sdh3, ATP19 - atp19p, ATP18 - atp18p, PGU1 - pgu1p, ACN9 - acn9p, TDH1 - tdh1p, BAT2 - bat2p, ADH2 - alcohol deh…
21S_rRNA		YOL154W	-2.37998	-2.68857	5.87e-12	1.48e-14		GO:0016999	antibiotic metabolic process	1.73e-12	4.54e-09	8.18	5550	62	197	18	[FUM1 - fumarase fum1, ICL2 - methylisocitrate lyase icl2, IDP3 - isocitrate dehydrogenase (nadp(+)) idp3, CIT2 - citrate (si)-synthase cit2, ICL1 - isocitrate lyase 1, ALD4 - aldehyde dehydrogenase (nadp(+)) ald4, CIT1 - citrate (si)-synthase cit1, ACH1 - ach1p, AHP1 - ahp1p, ACS1 - acetate--coa ligase 1, SHH4 - protein shh4, TSA2 - tsa2p, SDH3 - succinate dehydrogenase cytochrome b subunit sdh3…
HRA1		YJR153W	-2.52616	-2.81536	5.25e-55	8.69e-63		GO:0044281	small molecule metabolic process	1.31e-09	2.29e-06	2.23	5550	721	197	57	[YDR089W - hypothetical protein, ACH1 - ach1p, ATP19 - atp19p, ATP18 - atp18p, ACN9 - acn9p, BAT2 - bat2p, ALT2 - alanine transaminase alt2, FUM1 - fumarase fum1, GLN1 - glutamate--ammonia ligase, COX6 - cytochrome c oxidase subunit vi, URA2 - ura2p, IDP3 - isocitrate dehydrogenase (nadp(+)) idp3, CIT1 - citrate (si)-synthase cit1, YAT2 - carnitine o-acetyltransferase yat2, GDH2 - glutamate dehyd…
ICR1		YGL255W	-2.67039	-2.86144	1.2e-14	1.62e-16		GO:0043436	oxoacid metabolic process	3.29e-09	4.31e-06	2.7	5550	417	197	40	[HPA3 - hpa3p, AGX1 - alanine--glyoxylate transaminase, ICL2 - methylisocitrate lyase icl2, DLD3 - dld3p, ICL1 - isocitrate lyase 1, CIT2 - citrate (si)-synthase cit2, ACH1 - ach1p, YDR089W - hypothetical protein, YHR033W - putative glutamate 5-kinase, RMA1 - putative tetrahydrofolate synthase, SDH3 - succinate dehydrogenase cytochrome b subunit sdh3, HXK2 - hexokinase 2, CAT2 - carnitine o-acety…
LSR1		YLL025W	2.3359	-1.20917	4.67e-29	3.29e-05		GO:0006082	organic acid metabolic process	3.78e-09	3.97e-06	2.69	5550	419	197	40	[HPA3 - hpa3p, AGX1 - alanine--glyoxylate transaminase, ICL2 - methylisocitrate lyase icl2, DLD3 - dld3p, ICL1 - isocitrate lyase 1, CIT2 - citrate (si)-synthase cit2, ACH1 - ach1p, YDR089W - hypothetical protein, YHR033W - putative glutamate 5-kinase, RMA1 - putative tetrahydrofolate synthase, SDH3 - succinate dehydrogenase cytochrome b subunit sdh3, HXK2 - hexokinase 2, CAT2 - carnitine o-acety…
NME1		YIL117C	-1.62441	-1.34948	1.9e-21	3.6e-16		GO:0019752	carboxylic acid metabolic process	1.15e-08	1.01e-05	2.68	5550	400	197	38	[HPA3 - hpa3p, AGX1 - alanine--glyoxylate transaminase, ICL2 - methylisocitrate lyase icl2, DLD3 - dld3p, CIT2 - citrate (si)-synthase cit2, ICL1 - isocitrate lyase 1, ACH1 - ach1p, YHR033W - putative glutamate 5-kinase, RMA1 - putative tetrahydrofolate synthase, SDH3 - succinate dehydrogenase cytochrome b subunit sdh3, HXK2 - hexokinase 2, CAT2 - carnitine o-acetyltransferase cat2, ACN9 - acn9p,…
Q0050		YFL020C	1.34032	1.45502	6.36e-15	2.3e-17		GO:0055085	transmembrane transport	1.67e-08	1.25e-05	2.56	5550	441	197	40	[HXT13 - hxt13p, RSN1 - rsn1p, AGP2 - agp2p, PDR11 - atp-binding cassette multidrug transporter pdr11, PDR12 - atp-binding cassette multidrug transporter pdr12, COX7 - cytochrome c oxidase subunit vii, ITR1 - itr1p, PHO89 - pho89p, MIR1 - mir1p, ADY2 - ady2p, COX8 - cytochrome c oxidase subunit viii, FET4 - fet4p, ATP20 - atp20p, HXK2 - hexokinase 2, SDH3 - succinate dehydrogenase cytochrome b su…
Q0055		YIL015W	-1.42033	-1.4058	9.47e-13	1.53e-12		GO:0006811	ion transport	3.57e-08	2.34e-05	2.71	5550	364	197	35	[HXT13 - hxt13p, RSN1 - rsn1p, AGP2 - agp2p, COX7 - cytochrome c oxidase subunit vii, PHO89 - pho89p, MIR1 - mir1p, ADY2 - ady2p, COX8 - cytochrome c oxidase subunit viii, FET4 - fet4p, ATP20 - atp20p, RSB1 - phospholipid-translocating atpase rsb1, HXT3 - hxt3p, ATP19 - atp19p, HXT6 - hxt6p, ATP18 - atp18p, HXT17 - hxt17p, CTR3 - ctr3p, FRE3 - fre3p, FIT1 - fit1p, FMP43 - fmp43p, DIP5 - dip5p, CO…
Q0275		YML058W-A	2.6986	1.77636	2e-18	1.96e-08		GO:0071555	cell wall organization	1.89e-07	0.00011	3.19	5550	221	197	25	[WSC4 - wsc4p, BAR1 - bar1p, SCW11 - scw11p, PAU7 - pau7p, KNH1 - knh1p, PAU23 - pau23p, TIR3 - tir3p, SCW4 - scw4p, PIR1 - pir1p, TIR1 - tir1p, PGU1 - pgu1p, DAN1 - dan1p, UTR2 - utr2p, SPS100 - sps100p, SRL1 - srl1p, EXG1 - exg1p, PAU17 - pau17p, CWP1 - cwp1p, TIR4 - tir4p, TUS1 - tus1p, TIR2 - tir2p, MUM3 - mum3p, SKN1 - skn1p, YKL187C - hypothetical protein, AMA1 - ama1p]
RNA170		YLR037C	1.78929	1.62625	1.07e-07	1.46e-06		GO:0045229	external encapsulating structure organization	1.89e-07	9.89e-05	3.19	5550	221	197	25	[WSC4 - wsc4p, BAR1 - bar1p, SCW11 - scw11p, PAU7 - pau7p, KNH1 - knh1p, PAU23 - pau23p, TIR3 - tir3p, SCW4 - scw4p, PIR1 - pir1p, TIR1 - tir1p, PGU1 - pgu1p, DAN1 - dan1p, UTR2 - utr2p, SPS100 - sps100p, SRL1 - srl1p, EXG1 - exg1p, PAU17 - pau17p, CWP1 - cwp1p, TIR4 - tir4p, TUS1 - tus1p, TIR2 - tir2p, MUM3 - mum3p, SKN1 - skn1p, YKL187C - hypothetical protein, AMA1 - ama1p]
RPR1		YPR192W	2.44227	-1.44605	2.07e-17	2.19e-06		GO:0006812	cation transport	3.65e-07	0.000174	3.17	5550	213	197	24	[FRE3 - fre3p, HXT13 - hxt13p, COX6 - cytochrome c oxidase subunit vi, CTR1 - ctr1p, COX7 - cytochrome c oxidase subunit vii, PHO89 - pho89p, ATO2 - ato2p, ZRT1 - high-affinity zn(2+) transporter zrt1, ADY2 - ady2p, ATP15 - f1f0 atp synthase subunit epsilon, FET4 - fet4p, COX8 - cytochrome c oxidase subunit viii, ATO3 - ato3p, ATP20 - atp20p, FRE2 - fre2p, RSB1 - phospholipid-translocating atpase…
RUF20		YJL105W	1.76668	1.59154	2.44e-17	3.57e-14		GO:0034220	ion transmembrane transport	4.1e-07	0.000179	2.98	5550	246	197	26	[HXT13 - hxt13p, RSN1 - rsn1p, COX7 - cytochrome c oxidase subunit vii, PHO89 - pho89p, MIR1 - mir1p, ADY2 - ady2p, COX8 - cytochrome c oxidase subunit viii, FET4 - fet4p, ATP20 - atp20p, ATP19 - atp19p, HXT3 - hxt3p, ATP18 - atp18p, HXT6 - hxt6p, HXT17 - hxt17p, CTR3 - ctr3p, FMP43 - fmp43p, DIP5 - dip5p, COX6 - cytochrome c oxidase subunit vi, CTR1 - ctr1p, ATO2 - ato2p, ZRT1 - high-affinity zn…
RUF21		YNR072W	2.78509	3.193	0.000257869	2.29e-05		GO:0071554	cell wall organization or biogenesis	4.84e-07	0.000195	3.04	5550	232	197	25	[WSC4 - wsc4p, BAR1 - bar1p, SCW11 - scw11p, PAU7 - pau7p, KNH1 - knh1p, PAU23 - pau23p, TIR3 - tir3p, SCW4 - scw4p, PIR1 - pir1p, TIR1 - tir1p, PGU1 - pgu1p, DAN1 - dan1p, UTR2 - utr2p, SPS100 - sps100p, SRL1 - srl1p, EXG1 - exg1p, PAU17 - pau17p, CWP1 - cwp1p, TIR4 - tir4p, TUS1 - tus1p, TIR2 - tir2p, MUM3 - mum3p, SKN1 - skn1p, YKL187C - hypothetical protein, AMA1 - ama1p]
RUF23		YIL011W	1.28831	1.20274	8.41e-12	1.81e-10		GO:0031505	fungal-type cell wall organization	4.94e-07	0.000185	3.46	5550	171	197	21	[UTR2 - utr2p, BAR1 - bar1p, SPS100 - sps100p, SRL1 - srl1p, EXG1 - exg1p, PAU7 - pau7p, PAU23 - pau23p, KNH1 - knh1p, TIR3 - tir3p, PAU17 - pau17p, CWP1 - cwp1p, PIR1 - pir1p, TIR4 - tir4p, TIR2 - tir2p, TUS1 - tus1p, MUM3 - mum3p, SKN1 - skn1p, TIR1 - tir1p, YKL187C - hypothetical protein, AMA1 - ama1p, DAN1 - dan1p]
SCR1		YBR066C	0.880316	0.793029	1.34e-07	2.16e-06		GO:0006631	fatty acid metabolic process	4.97e-07	0.000174	5.93	5550	57	197	12	[FOX2 - bifunctional hydroxyacyl-coa dehydrogenase/enoyl-coa hydratase fox2, IZH2 - izh2p, ICL2 - methylisocitrate lyase icl2, IDP3 - isocitrate dehydrogenase (nadp(+)) idp3, CRC1 - crc1p, CAT2 - carnitine o-acetyltransferase cat2, SPS19 - sps19p, YAT2 - carnitine o-acetyltransferase yat2, ACH1 - ach1p, YAT1 - carnitine o-acetyltransferase yat1, PDH1 - pdh1p, CIT3 - citrate (si)-synthase cit3]
snR10		YOR237W	1.67464	1.70512	4.74e-15	1.46e-15		GO:0032787	monocarboxylic acid metabolic process	5.18e-07	0.00017	3.59	5550	157	197	20	[IZH2 - izh2p, ICL2 - methylisocitrate lyase icl2, ALD4 - aldehyde dehydrogenase (nadp(+)) ald4, DLD3 - dld3p, IDP3 - isocitrate dehydrogenase (nadp(+)) idp3, ICL1 - isocitrate lyase 1, CIT2 - citrate (si)-synthase cit2, ACH1 - ach1p, YAT2 - carnitine o-acetyltransferase yat2, ACS1 - acetate--coa ligase 1, FOX2 - bifunctional hydroxyacyl-coa dehydrogenase/enoyl-coa hydratase fox2, HXK2 - hexokina…
snR11		YIL162W	-3.21076	-3.6149	1.28e-26	4.16e-33		GO:0006099	tricarboxylic acid cycle	5.59e-07	0.000172	8.45	5550	30	197	9	[FUM1 - fumarase fum1, SDH3 - succinate dehydrogenase cytochrome b subunit sdh3, IDP3 - isocitrate dehydrogenase (nadp(+)) idp3, CIT2 - citrate (si)-synthase cit2, ICL1 - isocitrate lyase 1, CIT1 - citrate (si)-synthase cit1, SDH4 - succinate dehydrogenase membrane anchor subunit sdh4, CIT3 - citrate (si)-synthase cit3, SHH4 - protein shh4]
snR128		YIL013C	0.901826	0.768824	2.93e-16	3.83e-12		GO:0006101	citrate metabolic process	5.59e-07	0.000163	8.45	5550	30	197	9	[FUM1 - fumarase fum1, SDH3 - succinate dehydrogenase cytochrome b subunit sdh3, IDP3 - isocitrate dehydrogenase (nadp(+)) idp3, ICL1 - isocitrate lyase 1, CIT2 - citrate (si)-synthase cit2, CIT1 - citrate (si)-synthase cit1, SDH4 - succinate dehydrogenase membrane anchor subunit sdh4, CIT3 - citrate (si)-synthase cit3, SHH4 - protein shh4]
snR17a		YPL272C	1.46314	2.08458	9.14e-10	2.34e-18		GO:0072350	tricarboxylic acid metabolic process	7.63e-07	0.000211	8.18	5550	31	197	9	[FUM1 - fumarase fum1, SDH3 - succinate dehydrogenase cytochrome b subunit sdh3, IDP3 - isocitrate dehydrogenase (nadp(+)) idp3, CIT2 - citrate (si)-synthase cit2, ICL1 - isocitrate lyase 1, CIT1 - citrate (si)-synthase cit1, SDH4 - succinate dehydrogenase membrane anchor subunit sdh4, CIT3 - citrate (si)-synthase cit3, SHH4 - protein shh4]
snR17b		YLR042C	-0.775008	-1.45345	1.98e-07	8.54e-22		GO:0098655	cation transmembrane transport	9.71e-07	0.000255	3.32	5550	178	197	21	[HXT13 - hxt13p, COX6 - cytochrome c oxidase subunit vi, CTR1 - ctr1p, COX7 - cytochrome c oxidase subunit vii, PHO89 - pho89p, ATO2 - ato2p, ZRT1 - high-affinity zn(2+) transporter zrt1, ADY2 - ady2p, COX8 - cytochrome c oxidase subunit viii, FET4 - fet4p, ATP15 - f1f0 atp synthase subunit epsilon, ATO3 - ato3p, ATP20 - atp20p, ATP1 - f1f0 atp synthase subunit alpha, ATP19 - atp19p, HXT3 - hxt3p…
snR189		YOR009W	1.53677	0.615834	1.11e-13	0.00295803		GO:0098662	inorganic cation transmembrane transport	1.26e-06	0.000314	3.7	5550	137	197	18	[HXT13 - hxt13p, COX6 - cytochrome c oxidase subunit vi, CTR1 - ctr1p, COX7 - cytochrome c oxidase subunit vii, PHO89 - pho89p, ZRT1 - high-affinity zn(2+) transporter zrt1, FET4 - fet4p, COX8 - cytochrome c oxidase subunit viii, ATP15 - f1f0 atp synthase subunit epsilon, ATP20 - atp20p, ATP1 - f1f0 atp synthase subunit alpha, ATP19 - atp19p, HXT3 - hxt3p, ATP18 - atp18p, HXT6 - hxt6p, HXT17 - hx…
snR19		YIL057C	-1.3871	-1.92967	7.01e-07	6.51e-12		GO:0022904	respiratory electron transport chain	1.37e-06	0.000327	7.68	5550	33	197	9	[QCR9 - ubiquinol--cytochrome-c reductase subunit 9, SDH3 - succinate dehydrogenase cytochrome b subunit sdh3, COX6 - cytochrome c oxidase subunit vi, DLD3 - dld3p, COX7 - cytochrome c oxidase subunit vii, SDH4 - succinate dehydrogenase membrane anchor subunit sdh4, COX9 - cytochrome c oxidase subunit viia, COX8 - cytochrome c oxidase subunit viii, SHH4 - protein shh4]
snR190		YPR145C-A	1.49532	2.09549	0.000176005	6.29e-08		GO:0019541	propionate metabolic process	1.54e-06	0.000351	28.17	5550	4	197	4	[ICL2 - methylisocitrate lyase icl2, ACH1 - ach1p, PDH1 - pdh1p, CIT3 - citrate (si)-synthase cit3]
snR191		YNL289W	0.817062	0.807345	3.36e-10	5.41e-10		GO:0098660	inorganic ion transmembrane transport	1.67e-06	0.000364	3.48	5550	154	197	19	[HXT13 - hxt13p, COX6 - cytochrome c oxidase subunit vi, CTR1 - ctr1p, COX7 - cytochrome c oxidase subunit vii, PHO89 - pho89p, MIR1 - mir1p, ZRT1 - high-affinity zn(2+) transporter zrt1, COX8 - cytochrome c oxidase subunit viii, FET4 - fet4p, ATP15 - f1f0 atp synthase subunit epsilon, ATP20 - atp20p, ATP1 - f1f0 atp synthase subunit alpha, ATP19 - atp19p, HXT3 - hxt3p, ATP18 - atp18p, HXT6 - hxt…
snR3		YHR214W	-2.08186	-3.54717	8.87e-11	7.29e-17		GO:0071852	fungal-type cell wall organization or biogenesis	1.84e-06	0.000386	3.2	5550	185	197	21	[UTR2 - utr2p, BAR1 - bar1p, SPS100 - sps100p, SRL1 - srl1p, EXG1 - exg1p, PAU7 - pau7p, PAU23 - pau23p, KNH1 - knh1p, TIR3 - tir3p, PAU17 - pau17p, CWP1 - cwp1p, PIR1 - pir1p, TIR4 - tir4p, TIR2 - tir2p, TUS1 - tus1p, MUM3 - mum3p, SKN1 - skn1p, TIR1 - tir1p, YKL187C - hypothetical protein, AMA1 - ama1p, DAN1 - dan1p]
snR30		YHR214W-A	-2.41394	-4.34007	1.36e-15	3.83e-25		GO:0015672	monovalent inorganic cation transport	1.07e-05	0.00216	3.91	5550	101	197	14	[HXT13 - hxt13p, COX6 - cytochrome c oxidase subunit vi, COX7 - cytochrome c oxidase subunit vii, PHO89 - pho89p, ATP15 - f1f0 atp synthase subunit epsilon, COX8 - cytochrome c oxidase subunit viii, ATP20 - atp20p, ATP1 - f1f0 atp synthase subunit alpha, HXT3 - hxt3p, ATP19 - atp19p, ATP18 - atp18p, HXT6 - hxt6p, HXT17 - hxt17p, COX9 - cytochrome c oxidase subunit viia]
snR31		YDR384C	-1.2189	-2.98157	4.6e-20	1.71e-95		GO:1902600	proton transmembrane transport	1.42e-05	0.00275	4.07	5550	90	197	13	[HXT13 - hxt13p, COX6 - cytochrome c oxidase subunit vi, COX7 - cytochrome c oxidase subunit vii, ATP15 - f1f0 atp synthase subunit epsilon, COX8 - cytochrome c oxidase subunit viii, ATP20 - atp20p, ATP19 - atp19p, HXT3 - hxt3p, ATP1 - f1f0 atp synthase subunit alpha, HXT6 - hxt6p, ATP18 - atp18p, HXT17 - hxt17p, COX9 - cytochrome c oxidase subunit viia]
snR32		YLR040C	-0.844617	-1.00414	5.71e-06	8.37e-08		GO:0015677	copper ion import	2.08e-05	0.00389	12.81	5550	11	197	5	[FRE3 - fre3p, FRE2 - fre2p, CTR1 - ctr1p, FET4 - fet4p, CTR3 - ctr3p]
snR33		YOL101C	0.75028	1.19244	6.62e-08	3.62e-18		GO:0046459	short-chain fatty acid metabolic process	2.18e-05	0.00395	18.78	5550	6	197	4	[ICL2 - methylisocitrate lyase icl2, ACH1 - ach1p, PDH1 - pdh1p, CIT3 - citrate (si)-synthase cit3]
snR34		YIR019C	-1.25951	-4.56358	3.17e-21	5.77e-254		GO:0022900	electron transport chain	3.48e-05	0.00608	4.78	5550	59	197	10	[QCR9 - ubiquinol--cytochrome-c reductase subunit 9, SDH3 - succinate dehydrogenase cytochrome b subunit sdh3, COX6 - cytochrome c oxidase subunit vi, DLD3 - dld3p, ATP1 - f1f0 atp synthase subunit alpha, COX7 - cytochrome c oxidase subunit vii, SDH4 - succinate dehydrogenase membrane anchor subunit sdh4, COX9 - cytochrome c oxidase subunit viia, COX8 - cytochrome c oxidase subunit viii, SHH4 - p…
snR35		YIR038C	1.15632	0.802396	9.49e-15	8.05e-08		GO:0006847	plasma membrane acetate transport	4.41e-05	0.00745	28.17	5550	3	197	3	[ATO2 - ato2p, ADY2 - ady2p, ATO3 - ato3p]
snR37		YCR010C	-1.78648	-5.76888	1.81e-16	5.44e-97		GO:0019543	propionate catabolic process	4.41e-05	0.00722	28.17	5550	3	197	3	[ICL2 - methylisocitrate lyase icl2, PDH1 - pdh1p, CIT3 - citrate (si)-synthase cit3]
snR4		YIR032C	0.776058	0.781658	0.00118881	0.00107933		GO:0019626	short-chain fatty acid catabolic process	4.41e-05	0.007	28.17	5550	3	197	3	[ICL2 - methylisocitrate lyase icl2, PDH1 - pdh1p, CIT3 - citrate (si)-synthase cit3]
snR40		YEL071W	-0.633588	-2.20166	0.00571267	3.06e-21		GO:0019629	propionate catabolic process, 2-methylcitrate cycle	4.41e-05	0.0068	28.17	5550	3	197	3	[ICL2 - methylisocitrate lyase icl2, PDH1 - pdh1p, CIT3 - citrate (si)-synthase cit3]
snR41		YER011W	1.35688	-4.92248	1.15e-07	2.91e-75		GO:0019679	propionate metabolic process, methylcitrate cycle	4.41e-05	0.0066	28.17	5550	3	197	3	[ACH1 - ach1p, PDH1 - pdh1p, CIT3 - citrate (si)-synthase cit3]
snR42		YCR005C	-0.888259	-3.99376	1.85e-24	0		GO:0035433	acetate transmembrane transport	4.41e-05	0.00642	28.17	5550	3	197	3	[ATO2 - ato2p, ADY2 - ady2p, ATO3 - ato3p]
snR43		YGR066C	1.28897	1.36364	6.37e-06	1.61e-06		GO:1905117	regulation of ribonucleoside-diphosphate reductase activity	4.41e-05	0.00624	28.17	5550	3	197	3	[DIF1 - dif1p, SML1 - sml1p, HUG1 - hug1p]
snR44		YDR274C	-0.706264	0.8069	0.000182581	2.22e-06		GO:0015850	organic hydroxy compound transport	4.46e-05	0.00616	5.17	5550	49	197	9	[YMR034C - hypothetical protein, HXT13 - hxt13p, AUS1 - atp-binding cassette sterol transporter aus1, ITR1 - itr1p, PDR11 - atp-binding cassette multidrug transporter pdr11, PDR12 - atp-binding cassette multidrug transporter pdr12, HXT17 - hxt17p, HES1 - hes1p, DAN1 - dan1p]
snR45		YGR144W	1.89388	1.94582	1.89e-17	2.12e-18		GO:0009062	fatty acid catabolic process	6.44e-05	0.00866	8.05	5550	21	197	6	[FOX2 - bifunctional hydroxyacyl-coa dehydrogenase/enoyl-coa hydratase fox2, ICL2 - methylisocitrate lyase icl2, IDP3 - isocitrate dehydrogenase (nadp(+)) idp3, SPS19 - sps19p, PDH1 - pdh1p, CIT3 - citrate (si)-synthase cit3]
snR46		YGR180C	1.15571	0.712677	5.56e-32	5e-13		GO:0017001	antibiotic catabolic process	8.26e-05	0.0108	10.06	5550	14	197	5	[TSA2 - tsa2p, ICL2 - methylisocitrate lyase icl2, AHP1 - ahp1p, PDH1 - pdh1p, CIT3 - citrate (si)-synthase cit3]
snR49		YOR298W	1.53432	1.10084	7.51e-06	0.00165728		GO:0046395	carboxylic acid catabolic process	0.000147	0.0187	3.73	5550	83	197	11	[ALT2 - alanine transaminase alt2, FOX2 - bifunctional hydroxyacyl-coa dehydrogenase/enoyl-coa hydratase fox2, ICL2 - methylisocitrate lyase icl2, IDP3 - isocitrate dehydrogenase (nadp(+)) idp3, SPS19 - sps19p, PUT1 - proline dehydrogenase, GDH2 - glutamate dehydrogenase (nad(+)), BAT2 - bat2p, PDH1 - pdh1p, ADH2 - alcohol dehydrogenase adh2, CIT3 - citrate (si)-synthase cit3]
snR5		YLR041W	-0.794078	-0.86567	0.00692896	0.00343373		GO:0005975	carbohydrate metabolic process	0.000154	0.0193	2.4	5550	247	197	21	[DSF1 - mannitol dehydrogenase dsf1, UTR2 - utr2p, SCW11 - scw11p, IDP3 - isocitrate dehydrogenase (nadp(+)) idp3, CIT2 - citrate (si)-synthase cit2, ICL1 - isocitrate lyase 1, EXG1 - exg1p, YIG1 - yig1p, CIT1 - citrate (si)-synthase cit1, HOR2 - glycerol-1-phosphatase hor2, KNH1 - knh1p, SCW4 - scw4p, IMA1 - ima1p, HXK2 - hexokinase 2, GUT2 - glycerol-3-phosphate dehydrogenase, SKN1 - skn1p, PGU…
snR63		YMR244W	3.24698	1.64802	3.92e-12	0.000886671		GO:0006869	lipid transport	0.000156	0.0191	4.02	5550	70	197	10	[YMR034C - hypothetical protein, AUS1 - atp-binding cassette sterol transporter aus1, RSB1 - phospholipid-translocating atpase rsb1, PDR12 - atp-binding cassette multidrug transporter pdr12, PDR11 - atp-binding cassette multidrug transporter pdr11, PXA1 - atp-binding cassette long-chain fatty acid transporter pxa1, YKL187C - hypothetical protein, UPS2 - ups2p, HES1 - hes1p, DAN1 - dan1p]
snR68		YKL201C	0.817279	0.883185	3.13e-06	4.43e-07		GO:0016054	organic acid catabolic process	0.000163	0.0195	3.69	5550	84	197	11	[ALT2 - alanine transaminase alt2, FOX2 - bifunctional hydroxyacyl-coa dehydrogenase/enoyl-coa hydratase fox2, ICL2 - methylisocitrate lyase icl2, IDP3 - isocitrate dehydrogenase (nadp(+)) idp3, SPS19 - sps19p, PUT1 - proline dehydrogenase, GDH2 - glutamate dehydrogenase (nad(+)), BAT2 - bat2p, PDH1 - pdh1p, ADH2 - alcohol dehydrogenase adh2, CIT3 - citrate (si)-synthase cit3]
snR7-L		YJL171C	-0.592435	0.838429	1.17e-06	1.55e-12		GO:0015755	fructose transmembrane transport	0.00017	0.0198	8.8	5550	16	197	5	[HXT13 - hxt13p, HXK2 - hexokinase 2, HXT3 - hxt3p, HXT6 - hxt6p, HXT17 - hxt17p]
snR70		YGL028C	0.968071	1.43687	0.000234875	4.03e-08		GO:0015985	energy coupled proton transport, down electrochemical gradient	0.00017	0.0194	8.8	5550	16	197	5	[ATP20 - atp20p, ATP19 - atp19p, ATP1 - f1f0 atp synthase subunit alpha, ATP18 - atp18p, ATP15 - f1f0 atp synthase subunit epsilon]
snR8		YKL132C	0.739428	1.46507	0.00310449	1.05e-09		GO:0015986	ATP synthesis coupled proton transport	0.00017	0.019	8.8	5550	16	197	5	[ATP20 - atp20p, ATP19 - atp19p, ATP1 - f1f0 atp synthase subunit alpha, ATP18 - atp18p, ATP15 - f1f0 atp synthase subunit epsilon]
snR81		YGR225W	2.57096	2.2149	1.68e-05	0.000247241		GO:0006577	amino-acid betaine metabolic process	0.000172	0.0187	21.13	5550	4	197	3	[CAT2 - carnitine o-acetyltransferase cat2, YAT2 - carnitine o-acetyltransferase yat2, YAT1 - carnitine o-acetyltransferase yat1]
snR82		YOR315W	-0.893048	-0.882654	5.29e-08	7.4e-08		GO:0006846	acetate transport	0.000172	0.0184	21.13	5550	4	197	3	[ATO2 - ato2p, ADY2 - ady2p, ATO3 - ato3p]
snR83		YIL155C	-0.987087	-0.981671	3.45e-05	3.8e-05		GO:0009437	carnitine metabolic process	0.000172	0.018	21.13	5550	4	197	3	[CAT2 - carnitine o-acetyltransferase cat2, YAT2 - carnitine o-acetyltransferase yat2, YAT1 - carnitine o-acetyltransferase yat1]
snR84		YPR002W	-2.19138	-4.01657	1.14e-97	1.06e-228		GO:0009199	ribonucleoside triphosphate metabolic process	0.000201	0.0206	4.3	5550	59	197	9	[ATP20 - atp20p, HXK2 - hexokinase 2, COX6 - cytochrome c oxidase subunit vi, URA2 - ura2p, ATP1 - f1f0 atp synthase subunit alpha, ATP19 - atp19p, ATP18 - atp18p, TDH1 - tdh1p, ATP15 - f1f0 atp synthase subunit epsilon]
snR85		YJR150C	1.12594	0.763028	1.13e-14	1.69e-07		GO:0055114	oxidation-reduction process	0.000241	0.0243	1.99	5550	411	197	29	[DSF1 - mannitol dehydrogenase dsf1, DLD3 - dld3p, COX7 - cytochrome c oxidase subunit vii, AHP1 - ahp1p, COX8 - cytochrome c oxidase subunit viii, QCR9 - ubiquinol--cytochrome-c reductase subunit 9, RNR4 - ribonucleotide-diphosphate reductase subunit rnr4, SDH3 - succinate dehydrogenase cytochrome b subunit sdh3, TSA2 - tsa2p, TDH1 - tdh1p, ADH2 - alcohol dehydrogenase adh2, RGI2 - rgi2p, FRE3 -…
snR86		YAR035W	-1.27289	-1.97856	1.37e-34	1.34e-75		GO:0009259	ribonucleotide metabolic process	0.00025	0.0247	3.1	5550	118	197	13	[URA2 - ura2p, COX6 - cytochrome c oxidase subunit vi, CIT1 - citrate (si)-synthase cit1, ACH1 - ach1p, ACS1 - acetate--coa ligase 1, ATP15 - f1f0 atp synthase subunit epsilon, ATP20 - atp20p, URA4 - dihydroorotase, HXK2 - hexokinase 2, ATP19 - atp19p, ATP1 - f1f0 atp synthase subunit alpha, ATP18 - atp18p, TDH1 - tdh1p]
snR87		YLR109W	1.27887	1.03313	1.39e-07	2.12e-05		GO:0009201	ribonucleoside triphosphate biosynthetic process	0.000282	0.0274	4.6	5550	49	197	8	[ATP20 - atp20p, HXK2 - hexokinase 2, URA2 - ura2p, ATP1 - f1f0 atp synthase subunit alpha, ATP19 - atp19p, ATP18 - atp18p, TDH1 - tdh1p, ATP15 - f1f0 atp synthase subunit epsilon]
snR9		YGL045W	-0.737978	0.889296	1.37e-06	1.46e-09		GO:0009084	glutamine family amino acid biosynthetic process	0.000294	0.028	6.26	5550	27	197	6	[CPA1 - carbamoyl-phosphate synthase (glutamine-hydrolyzing) cpa1, GLN1 - glutamate--ammonia ligase, CIT2 - citrate (si)-synthase cit2, CIT1 - citrate (si)-synthase cit1, PUT1 - proline dehydrogenase, YHR033W - putative glutamate 5-kinase]
SRG1		YMR266W	-0.845804	0.646018	1.23e-09	1.27e-06		GO:0046034	ATP metabolic process	0.000325	0.0305	4.51	5550	50	197	8	[ATP20 - atp20p, HXK2 - hexokinase 2, COX6 - cytochrome c oxidase subunit vi, ATP1 - f1f0 atp synthase subunit alpha, ATP19 - atp19p, ATP18 - atp18p, TDH1 - tdh1p, ATP15 - f1f0 atp synthase subunit epsilon]
tG(CCC)O		YDL049C	0.603625	-1.44337	4.12e-09	1.41e-34		GO:1904659	glucose transmembrane transport	0.000415	0.0381	7.41	5550	19	197	5	[HXT13 - hxt13p, HXK2 - hexokinase 2, HXT3 - hxt3p, HXT6 - hxt6p, HXT17 - hxt17p]
TLC1		YBR132C	-0.969653	-1.49928	2.99e-08	3.19e-17		GO:0006754	ATP biosynthetic process	0.000439	0.0397	4.93	5550	40	197	7	[ATP20 - atp20p, HXK2 - hexokinase 2, ATP1 - f1f0 atp synthase subunit alpha, ATP19 - atp19p, ATP18 - atp18p, TDH1 - tdh1p, ATP15 - f1f0 atp synthase subunit epsilon]
tX(XXX)D		YLR210W	0.742113	0.726131	0.000986921	0.00127022		GO:0015918	sterol transport	0.000444	0.0395	5.83	5550	29	197	6	[YMR034C - hypothetical protein, AUS1 - atp-binding cassette sterol transporter aus1, PDR12 - atp-binding cassette multidrug transporter pdr12, PDR11 - atp-binding cassette multidrug transporter pdr11, HES1 - hes1p, DAN1 - dan1p]
YAL001C		YGL075C	1.09515	0.946281	9.14e-05	0.000790206		GO:0009117	nucleotide metabolic process	0.000446	0.039	2.4	5550	211	197	18	[URA2 - ura2p, COX6 - cytochrome c oxidase subunit vi, ALD4 - aldehyde dehydrogenase (nadp(+)) ald4, IDP3 - isocitrate dehydrogenase (nadp(+)) idp3, CIT1 - citrate (si)-synthase cit1, ACH1 - ach1p, ACS1 - acetate--coa ligase 1, ATP15 - f1f0 atp synthase subunit epsilon, ATP20 - atp20p, URA4 - dihydroorotase, RNR4 - ribonucleotide-diphosphate reductase subunit rnr4, HXK2 - hexokinase 2, GUT2 - gly…
YAL002W		YKL220C	-1.51491	-1.25008	0.000367797	0.00322049		GO:0055086	nucleobase-containing small molecule metabolic process	0.000473	0.0407	2.26	5550	249	197	20	[URA2 - ura2p, COX6 - cytochrome c oxidase subunit vi, ALD4 - aldehyde dehydrogenase (nadp(+)) ald4, IDP3 - isocitrate dehydrogenase (nadp(+)) idp3, CIT1 - citrate (si)-synthase cit1, ACH1 - ach1p, ACS1 - acetate--coa ligase 1, ATP15 - f1f0 atp synthase subunit epsilon, ATP20 - atp20p, RNR4 - ribonucleotide-diphosphate reductase subunit rnr4, URA4 - dihydroorotase, HXK2 - hexokinase 2, CPA1 - car…
YAL003W		YDR089W	0.958346	0.604415	2.14e-10	8.34e-05		GO:0009142	nucleoside triphosphate biosynthetic process	0.00049	0.0415	4.25	5550	53	197	8	[ATP20 - atp20p, HXK2 - hexokinase 2, URA2 - ura2p, ATP1 - f1f0 atp synthase subunit alpha, ATP19 - atp19p, ATP18 - atp18p, TDH1 - tdh1p, ATP15 - f1f0 atp synthase subunit epsilon]
YAL005C		YGL038C	0.864293	0.591823	8.79e-06	0.00238819		GO:0006091	generation of precursor metabolites and energy	0.000536	0.0446	2.62	5550	161	197	15	[RSF1 - rsf1p, COX6 - cytochrome c oxidase subunit vi, DLD3 - dld3p, COX7 - cytochrome c oxidase subunit vii, ACS1 - acetate--coa ligase 1, COX8 - cytochrome c oxidase subunit viii, SHH4 - protein shh4, QCR9 - ubiquinol--cytochrome-c reductase subunit 9, SDH3 - succinate dehydrogenase cytochrome b subunit sdh3, HXK2 - hexokinase 2, ATP1 - f1f0 atp synthase subunit alpha, TDH1 - tdh1p, SDH4 - succ…
YAL007C		YGR230W	-0.890186	-0.597422	9.62e-05	0.00725259		GO:0006825	copper ion transport	0.000537	0.044	7.04	5550	20	197	5	[FRE3 - fre3p, FRE2 - fre2p, CTR1 - ctr1p, FET4 - fet4p, CTR3 - ctr3p]
YAL008W		YLR232W	1.04774	0.955228	0.00310212	0.00728473		GO:0008645	hexose transmembrane transport	0.000537	0.0433	7.04	5550	20	197	5	[HXT13 - hxt13p, HXK2 - hexokinase 2, HXT3 - hxt3p, HXT6 - hxt6p, HXT17 - hxt17p]
YAL009W		YEL070W	0.674625	1.22597	0.00346767	5.1e-08		GO:0015749	monosaccharide transmembrane transport	0.000537	0.0427	7.04	5550	20	197	5	[HXT13 - hxt13p, HXK2 - hexokinase 2, HXT3 - hxt3p, HXT6 - hxt6p, HXT17 - hxt17p]
YAL010C		YGR287C	1.30309	0.893883	1.83e-06	0.0013276		GO:0009205	purine ribonucleoside triphosphate metabolic process	0.000558	0.0437	4.17	5550	54	197	8	[ATP20 - atp20p, HXK2 - hexokinase 2, COX6 - cytochrome c oxidase subunit vi, ATP1 - f1f0 atp synthase subunit alpha, ATP19 - atp19p, ATP18 - atp18p, TDH1 - tdh1p, ATP15 - f1f0 atp synthase subunit epsilon]
YAL011W		YOL002C	0.677775	0.804067	8.98e-08	2.14e-10		GO:0006753	nucleoside phosphate metabolic process	0.000591	0.0456	2.35	5550	216	197	18	[URA2 - ura2p, COX6 - cytochrome c oxidase subunit vi, ALD4 - aldehyde dehydrogenase (nadp(+)) ald4, IDP3 - isocitrate dehydrogenase (nadp(+)) idp3, CIT1 - citrate (si)-synthase cit1, ACH1 - ach1p, ACS1 - acetate--coa ligase 1, ATP15 - f1f0 atp synthase subunit epsilon, ATP20 - atp20p, URA4 - dihydroorotase, RNR4 - ribonucleotide-diphosphate reductase subunit rnr4, HXK2 - hexokinase 2, GUT2 - gly…
YAL012W		YLR437C	-0.617924	-0.629474	0.0076703	0.00660044		GO:0009141	nucleoside triphosphate metabolic process	0.000598	0.0454	3.73	5550	68	197	9	[ATP20 - atp20p, HXK2 - hexokinase 2, COX6 - cytochrome c oxidase subunit vi, URA2 - ura2p, ATP1 - f1f0 atp synthase subunit alpha, ATP19 - atp19p, ATP18 - atp18p, TDH1 - tdh1p, ATP15 - f1f0 atp synthase subunit epsilon]
YAL013W		YJR047C	1.38162	1.10285	1.13e-09	1.28e-06		GO:0006123	mitochondrial electron transport, cytochrome c to oxygen	0.000609	0.0456	9.39	5550	12	197	4	[COX6 - cytochrome c oxidase subunit vi, COX7 - cytochrome c oxidase subunit vii, COX8 - cytochrome c oxidase subunit viii, COX9 - cytochrome c oxidase subunit viia]
YAL014C		YEL069C	1.92278	1.94445	1.35e-05	1.06e-05		GO:0019646	aerobic electron transport chain	0.000609	0.045	9.39	5550	12	197	4	[COX6 - cytochrome c oxidase subunit vi, COX7 - cytochrome c oxidase subunit vii, COX9 - cytochrome c oxidase subunit viia, COX8 - cytochrome c oxidase subunit viii]
YAL015C		YPL054W	1.18254	1.08747	2e-05	8.9e-05		GO:0015718	monocarboxylic acid transport	0.000649	0.0473	5.45	5550	31	197	6	[FMP43 - fmp43p, PXA1 - atp-binding cassette long-chain fatty acid transporter pxa1, YKL187C - hypothetical protein, ATO2 - ato2p, ADY2 - ady2p, ATO3 - ato3p]
YAL016C-A		YOR010C	1.73921	6.46396	7.72e-24	0		GO:0009144	purine nucleoside triphosphate metabolic process	0.000718	0.0515	4.02	5550	56	197	8	[ATP20 - atp20p, HXK2 - hexokinase 2, COX6 - cytochrome c oxidase subunit vi, ATP1 - f1f0 atp synthase subunit alpha, ATP19 - atp19p, ATP18 - atp18p, TDH1 - tdh1p, ATP15 - f1f0 atp synthase subunit epsilon]
YAL016W		YOR374W	-0.878001	-2.40959	2.42e-16	1.31e-110		GO:0042737	drug catabolic process	0.000801	0.0567	4.48	5550	44	197	7	[TSA2 - tsa2p, ICL2 - methylisocitrate lyase icl2, DAL3 - ureidoglycolate hydrolase, PGU1 - pgu1p, AHP1 - ahp1p, PDH1 - pdh1p, CIT3 - citrate (si)-synthase cit3]
YAL017W		YLR300W	0.678814	-0.914406	5.33e-07	1.96e-11		GO:0009206	purine ribonucleoside triphosphate biosynthetic process	0.000801	0.056	4.48	5550	44	197	7	[ATP20 - atp20p, HXK2 - hexokinase 2, ATP1 - f1f0 atp synthase subunit alpha, ATP19 - atp19p, ATP18 - atp18p, TDH1 - tdh1p, ATP15 - f1f0 atp synthase subunit epsilon]
YAL018C		YLL060C	0.655959	0.914778	0.0013397	5.74e-06		GO:0009145	purine nucleoside triphosphate biosynthetic process	0.000801	0.0552	4.48	5550	44	197	7	[ATP20 - atp20p, HXK2 - hexokinase 2, ATP1 - f1f0 atp synthase subunit alpha, ATP19 - atp19p, ATP18 - atp18p, TDH1 - tdh1p, ATP15 - f1f0 atp synthase subunit epsilon]
YAL019W		YDL028C	0.604845	0.676071	0.000794731	0.000162081		GO:0051341	regulation of oxidoreductase activity	0.000814	0.0554	14.09	5550	6	197	3	[DIF1 - dif1p, SML1 - sml1p, HUG1 - hug1p]
YAL019W-A		YJL133C-A	-0.780168	-7.81516	1.33e-13	1.06e-107		GO:0009064	glutamine family amino acid metabolic process	0.000911	0.0613	3.89	5550	58	197	8	[CPA1 - carbamoyl-phosphate synthase (glutamine-hydrolyzing) cpa1, URA2 - ura2p, GLN1 - glutamate--ammonia ligase, CIT2 - citrate (si)-synthase cit2, CIT1 - citrate (si)-synthase cit1, PUT1 - proline dehydrogenase, GDH2 - glutamate dehydrogenase (nad(+)), YHR033W - putative glutamate 5-kinase]
YAL020C		SCR1	-1.1854	-1.43925	0.000344692	2.11e-05		GO:0044242	cellular lipid catabolic process	0.00092	0.0611	4.38	5550	45	197	7	[FOX2 - bifunctional hydroxyacyl-coa dehydrogenase/enoyl-coa hydratase fox2, ICL2 - methylisocitrate lyase icl2, IDP3 - isocitrate dehydrogenase (nadp(+)) idp3, SPS19 - sps19p, YPC1 - phytoceramidase, PDH1 - pdh1p, CIT3 - citrate (si)-synthase cit3]
YAL021C		YOR247W	-0.982449	-0.812061	1.5e-14	1.98e-10		GO:0072329	monocarboxylic acid catabolic process	0.000921	0.0603	5.12	5550	33	197	6	[FOX2 - bifunctional hydroxyacyl-coa dehydrogenase/enoyl-coa hydratase fox2, ICL2 - methylisocitrate lyase icl2, IDP3 - isocitrate dehydrogenase (nadp(+)) idp3, SPS19 - sps19p, PDH1 - pdh1p, CIT3 - citrate (si)-synthase cit3]
YAL022C		YDL227C	1.66742	0.643134	1.35e-12	0.0067133		GO:0055076	transition metal ion homeostasis	0.000933	0.0604	3.24	5550	87	197	10	[FIT1 - fit1p, FRE3 - fre3p, FRE2 - fre2p, ISU1 - isu1p, IZH2 - izh2p, CTR1 - ctr1p, FET4 - fet4p, FIT3 - fit3p, CTR3 - ctr3p, IZH4 - izh4p]
YAL023C		YCR020C	0.857075	0.743859	0.00101945	0.0046226		GO:0005215	transporter activity	4.42e-10	1.1e-06	2.79	5550	424	197	42	[HXT13 - hxt13p, RSN1 - rsn1p, WSC4 - wsc4p, AGP2 - agp2p, PDR11 - atp-binding cassette multidrug transporter pdr11, PDR12 - atp-binding cassette multidrug transporter pdr12, COX7 - cytochrome c oxidase subunit vii, ITR1 - itr1p, PHO89 - pho89p, MIR1 - mir1p, ADY2 - ady2p, COX8 - cytochrome c oxidase subunit viii, FET4 - fet4p, ATP20 - atp20p, RSB1 - phospholipid-translocating atpase rsb1, HXT3 -…
YAL024C		YKL164C	0.642097	-0.663188	3.6e-10	2.2e-10		GO:0015318	inorganic molecular entity transmembrane transporter activity	1.4e-09	1.74e-06	3.55	5550	230	197	29	[HXT13 - hxt13p, RSN1 - rsn1p, COX7 - cytochrome c oxidase subunit vii, ITR1 - itr1p, PHO89 - pho89p, MIR1 - mir1p, ADY2 - ady2p, COX8 - cytochrome c oxidase subunit viii, FET4 - fet4p, ATP20 - atp20p, HXT3 - hxt3p, ATP19 - atp19p, ATP18 - atp18p, HXT6 - hxt6p, HXT17 - hxt17p, CTR3 - ctr3p, FMP43 - fmp43p, DIP5 - dip5p, AQY1 - aqy1p, COX6 - cytochrome c oxidase subunit vi, CTR1 - ctr1p, ATO2 - at…
YAL025C		YDL215C	-0.754213	-0.622525	3.45e-07	2.55e-05		GO:0022857	transmembrane transporter activity	5.7e-09	4.74e-06	2.85	5550	356	197	36	[HXT13 - hxt13p, RSN1 - rsn1p, AGP2 - agp2p, COX7 - cytochrome c oxidase subunit vii, ITR1 - itr1p, PDR12 - atp-binding cassette multidrug transporter pdr12, PDR11 - atp-binding cassette multidrug transporter pdr11, PHO89 - pho89p, MIR1 - mir1p, ADY2 - ady2p, FET4 - fet4p, COX8 - cytochrome c oxidase subunit viii, ATP20 - atp20p, ATP19 - atp19p, HXT3 - hxt3p, HXT6 - hxt6p, ATP18 - atp18p, HXT17 -…
YAL026C		YLR307C-A	-0.831679	1.32821	1.54e-05	1.57e-12		GO:0005199	structural constituent of cell wall	2.81e-08	1.75e-05	9.71	5550	29	197	10	[PIR1 - pir1p, TIR4 - tir4p, TIR2 - tir2p, PAU7 - pau7p, TIR1 - tir1p, PAU23 - pau23p, PAU17 - pau17p, TIR3 - tir3p, CWP1 - cwp1p, DAN1 - dan1p]
YAL026C-A		YMR303C	-2.04013	-2.95834	1.42e-45	1.75e-93		GO:0022890	inorganic cation transmembrane transporter activity	7.59e-08	3.79e-05	4.02	5550	140	197	20	[HXT13 - hxt13p, RSN1 - rsn1p, COX6 - cytochrome c oxidase subunit vi, ITR1 - itr1p, CTR1 - ctr1p, COX7 - cytochrome c oxidase subunit vii, PHO89 - pho89p, ZRT1 - high-affinity zn(2+) transporter zrt1, COX8 - cytochrome c oxidase subunit viii, FET4 - fet4p, ATP15 - f1f0 atp synthase subunit epsilon, ATP20 - atp20p, ATP1 - f1f0 atp synthase subunit alpha, HXT3 - hxt3p, ATP19 - atp19p, ATP18 - atp1…
YAL027W		YMR319C	-0.677264	-0.771349	5.29e-05	4.42e-06		GO:0008324	cation transmembrane transporter activity	8.77e-08	3.65e-05	3.54	5550	183	197	23	[HXT13 - hxt13p, RSN1 - rsn1p, COX6 - cytochrome c oxidase subunit vi, ITR1 - itr1p, CTR1 - ctr1p, COX7 - cytochrome c oxidase subunit vii, PHO89 - pho89p, ATO2 - ato2p, ZRT1 - high-affinity zn(2+) transporter zrt1, ADY2 - ady2p, FET4 - fet4p, COX8 - cytochrome c oxidase subunit viii, ATP15 - f1f0 atp synthase subunit epsilon, ATO3 - ato3p, ATP20 - atp20p, ATP1 - f1f0 atp synthase subunit alpha, …
YAL028W		YLR251W	1.35477	0.99544	0.000188958	0.00631239		GO:0015075	ion transmembrane transporter activity	8.95e-07	0.000319	2.86	5550	256	197	26	[HXT13 - hxt13p, RSN1 - rsn1p, COX7 - cytochrome c oxidase subunit vii, ITR1 - itr1p, PHO89 - pho89p, ADY2 - ady2p, FET4 - fet4p, COX8 - cytochrome c oxidase subunit viii, ATP20 - atp20p, ATP19 - atp19p, HXT3 - hxt3p, ATP18 - atp18p, HXT6 - hxt6p, HXT17 - hxt17p, CTR3 - ctr3p, FMP43 - fmp43p, DIP5 - dip5p, COX6 - cytochrome c oxidase subunit vi, CTR1 - ctr1p, ATO2 - ato2p, ZRT1 - high-affinity zn…
YAL029C		YDR111C	-1.13169	-1.54986	1.69e-09	4.43e-16		GO:0015077	monovalent inorganic cation transmembrane transporter activity	1.63e-06	0.000509	4.27	5550	99	197	15	[HXT13 - hxt13p, COX6 - cytochrome c oxidase subunit vi, ITR1 - itr1p, COX7 - cytochrome c oxidase subunit vii, PHO89 - pho89p, ATP15 - f1f0 atp synthase subunit epsilon, COX8 - cytochrome c oxidase subunit viii, ATP20 - atp20p, ATP1 - f1f0 atp synthase subunit alpha, ATP19 - atp19p, HXT3 - hxt3p, ATP18 - atp18p, HXT6 - hxt6p, HXT17 - hxt17p, COX9 - cytochrome c oxidase subunit viia]
YAL030W		YLR425W	0.699644	0.610906	0.000130159	0.000883365		GO:0015078	proton transmembrane transporter activity	3.05e-06	0.000846	4.33	5550	91	197	14	[HXT13 - hxt13p, COX6 - cytochrome c oxidase subunit vi, COX7 - cytochrome c oxidase subunit vii, ITR1 - itr1p, ATP15 - f1f0 atp synthase subunit epsilon, COX8 - cytochrome c oxidase subunit viii, ATP20 - atp20p, HXT3 - hxt3p, ATP19 - atp19p, ATP1 - f1f0 atp synthase subunit alpha, HXT6 - hxt6p, ATP18 - atp18p, HXT17 - hxt17p, COX9 - cytochrome c oxidase subunit viia]
YAL031C		YDR155C	1.24362	0.751114	3.75e-15	2.07e-06		GO:0004553	hydrolase activity, hydrolyzing O-glycosyl compounds	3.38e-06	0.000842	6.12	5550	46	197	10	[IMA1 - ima1p, UTR2 - utr2p, SCW11 - scw11p, EXG1 - exg1p, SKN1 - skn1p, YPC1 - phytoceramidase, PGU1 - pgu1p, SUC2 - beta-fructofuranosidase suc2, DSE4 - dse4p, SCW4 - scw4p]
YAL031W-A		YGR143W	0.623027	0.808978	0.000908414	1.56e-05		GO:0016798	hydrolase activity, acting on glycosyl bonds	2.54e-05	0.00577	4.94	5550	57	197	10	[IMA1 - ima1p, UTR2 - utr2p, SCW11 - scw11p, EXG1 - exg1p, SKN1 - skn1p, YPC1 - phytoceramidase, PGU1 - pgu1p, SUC2 - beta-fructofuranosidase suc2, DSE4 - dse4p, SCW4 - scw4p]
YAL032C		YPL265W	-1.29805	-1.92906	8.79e-31	7.69e-65		GO:0015926	glucosidase activity	3.1e-05	0.00644	7.3	5550	27	197	7	[IMA1 - ima1p, SCW11 - scw11p, EXG1 - exg1p, SKN1 - skn1p, SUC2 - beta-fructofuranosidase suc2, DSE4 - dse4p, SCW4 - scw4p]
YAL033W		YAL054C	-1.08039	-2.56862	3.46e-06	3.29e-28		GO:1990846	ribonucleoside-diphosphate reductase inhibitor activity	4.41e-05	0.00846	28.17	5550	3	197	3	[DIF1 - dif1p, SML1 - sml1p, HUG1 - hug1p]
YAL034C		YLR142W	-1.2075	-0.73517	9.45e-29	3.38e-12		GO:0004092	carnitine O-acetyltransferase activity	4.41e-05	0.00785	28.17	5550	3	197	3	[CAT2 - carnitine o-acetyltransferase cat2, YAT2 - carnitine o-acetyltransferase yat2, YAT1 - carnitine o-acetyltransferase yat1]
YAL034C-B		YOR182C	-0.700149	-0.617715	0.00013307	0.000738345		GO:0004108	citrate (Si)-synthase activity	4.41e-05	0.00733	28.17	5550	3	197	3	[CIT2 - citrate (si)-synthase cit2, CIT1 - citrate (si)-synthase cit1, CIT3 - citrate (si)-synthase cit3]
YAL034W-A		YDR154C	1.23517	0.730463	3.64e-13	1.76e-05		GO:0036440	citrate synthase activity	4.41e-05	0.00687	28.17	5550	3	197	3	[CIT2 - citrate (si)-synthase cit2, CIT1 - citrate (si)-synthase cit1, CIT3 - citrate (si)-synthase cit3]
YAL035W		YER072W	-0.844858	-0.682319	4.13e-14	8.53e-10		GO:0015123	acetate transmembrane transporter activity	4.41e-05	0.00647	28.17	5550	3	197	3	[ATO2 - ato2p, ADY2 - ady2p, ATO3 - ato3p]
YAL036C		YDL197C	0.692493	0.865479	3.95e-05	2.18e-07		GO:0016406	carnitine O-acyltransferase activity	4.41e-05	0.00611	28.17	5550	3	197	3	[CAT2 - carnitine o-acetyltransferase cat2, YAT2 - carnitine o-acetyltransferase yat2, YAT1 - carnitine o-acetyltransferase yat1]
YAL037C-B		YOR338W	-1.7266	-1.35176	3.29e-16	1.12e-10		GO:0022804	active transmembrane transporter activity	4.79e-05	0.0063	2.97	5550	161	197	17	[HXT13 - hxt13p, PDR11 - atp-binding cassette multidrug transporter pdr11, PDR12 - atp-binding cassette multidrug transporter pdr12, ITR1 - itr1p, PHO89 - pho89p, MIR1 - mir1p, ATP15 - f1f0 atp synthase subunit epsilon, ATP20 - atp20p, AUS1 - atp-binding cassette sterol transporter aus1, ATP1 - f1f0 atp synthase subunit alpha, ATP19 - atp19p, HXT3 - hxt3p, CRC1 - crc1p, ATP18 - atp18p, PXA1 - atp…
YAL037W		YOR011W	0.63547	0.777918	1.04e-06	1.96e-09		GO:0046933	proton-transporting ATP synthase activity, rotational mechanism	8.26e-05	0.0103	10.06	5550	14	197	5	[ATP20 - atp20p, ATP19 - atp19p, ATP1 - f1f0 atp synthase subunit alpha, ATP18 - atp18p, ATP15 - f1f0 atp synthase subunit epsilon]
YAL038W		YPL200W	-1.57948	-1.42437	8e-09	1.07e-07		GO:0016491	oxidoreductase activity	8.42e-05	0.01	2.23	5550	329	197	26	[DSF1 - mannitol dehydrogenase dsf1, DLD3 - dld3p, COX7 - cytochrome c oxidase subunit vii, AHP1 - ahp1p, COX8 - cytochrome c oxidase subunit viii, QCR9 - ubiquinol--cytochrome-c reductase subunit 9, RNR4 - ribonucleotide-diphosphate reductase subunit rnr4, SDH3 - succinate dehydrogenase cytochrome b subunit sdh3, TSA2 - tsa2p, TDH1 - tdh1p, ADH2 - alcohol dehydrogenase adh2, FRE3 - fre3p, COX6 -…
YAL039C		YER024W	-1.30221	-1.98187	9.75e-58	2.36e-117		GO:0043492	ATPase activity, coupled to movement of substances	0.000176	0.02	3.97	5550	71	197	10	[ATP20 - atp20p, AUS1 - atp-binding cassette sterol transporter aus1, RSB1 - phospholipid-translocating atpase rsb1, ATP1 - f1f0 atp synthase subunit alpha, ATP19 - atp19p, PDR11 - atp-binding cassette multidrug transporter pdr11, PDR12 - atp-binding cassette multidrug transporter pdr12, PXA1 - atp-binding cassette long-chain fatty acid transporter pxa1, ATP18 - atp18p, ATP15 - f1f0 atp synthase …
YAL040C		YHR033W	0.797917	-1.09623	5.26e-11	1.68e-18		GO:0042626	ATPase activity, coupled to transmembrane movement of substances	0.000377	0.0409	3.96	5550	64	197	9	[ATP20 - atp20p, AUS1 - atp-binding cassette sterol transporter aus1, ATP1 - f1f0 atp synthase subunit alpha, ATP19 - atp19p, PDR11 - atp-binding cassette multidrug transporter pdr11, PDR12 - atp-binding cassette multidrug transporter pdr12, PXA1 - atp-binding cassette long-chain fatty acid transporter pxa1, ATP18 - atp18p, ATP15 - f1f0 atp synthase subunit epsilon]
YAL041W		YMR030W	-0.642834	0.766384	0.0010343	1.57e-05		GO:0008422	beta-glucosidase activity	0.000418	0.0434	10.24	5550	11	197	4	[SCW11 - scw11p, EXG1 - exg1p, DSE4 - dse4p, SCW4 - scw4p]
YAL042C-A		YMR160W	0.604005	0.644135	0.00262716	0.00129622		GO:0042895	antibiotic transmembrane transporter activity	0.000418	0.0417	16.9	5550	5	197	3	[ATO2 - ato2p, ADY2 - ady2p, ATO3 - ato3p]
YAL042W		YDR497C	-1.00282	-0.767134	2.7e-22	9.94e-14		GO:0042973	glucan endo-1,3-beta-D-glucosidase activity	0.000814	0.0781	14.09	5550	6	197	3	[SCW11 - scw11p, SCW4 - scw4p, DSE4 - dse4p]
YAL043C		YOR303W	-0.930195	-0.839528	5.55e-05	0.000273305		GO:0005375	copper ion transmembrane transporter activity	0.000814	0.0752	14.09	5550	6	197	3	[CTR1 - ctr1p, FET4 - fet4p, CTR3 - ctr3p]
YAL044C		YDR525W-A	-1.00591	-0.762674	4.69e-10	1.5e-06		GO:0004129	cytochrome-c oxidase activity	0.000856	0.0762	8.67	5550	13	197	4	[COX6 - cytochrome c oxidase subunit vi, COX7 - cytochrome c oxidase subunit vii, COX9 - cytochrome c oxidase subunit viia, COX8 - cytochrome c oxidase subunit viii]
YAL044W-A		YKL140W	0.622044	0.614771	0.00835649	0.0091442		GO:0016675	oxidoreductase activity, acting on a heme group of donors	0.000856	0.0736	8.67	5550	13	197	4	[COX6 - cytochrome c oxidase subunit vi, COX7 - cytochrome c oxidase subunit vii, COX9 - cytochrome c oxidase subunit viia, COX8 - cytochrome c oxidase subunit viii]
YAL045C		YPL066W	0.789267	0.699532	2.13e-05	0.000167238		GO:0016676	oxidoreductase activity, acting on a heme group of donors, oxygen as acceptor	0.000856	0.0712	8.67	5550	13	197	4	[COX6 - cytochrome c oxidase subunit vi, COX7 - cytochrome c oxidase subunit vii, COX9 - cytochrome c oxidase subunit viia, COX8 - cytochrome c oxidase subunit viii]
YAL046C		YGR250C	-0.905924	0.825358	2.01e-11	4.72e-10		GO:0015578	mannose transmembrane transporter activity	0.000856	0.0689	8.67	5550	13	197	4	[HXT13 - hxt13p, HXT3 - hxt3p, HXT6 - hxt6p, HXT17 - hxt17p]
YAL047C		YHL028W	0.686404	0.59716	0.00286535	0.00969861		GO:0015002	heme-copper terminal oxidase activity	0.000856	0.0667	8.67	5550	13	197	4	[COX6 - cytochrome c oxidase subunit vi, COX7 - cytochrome c oxidase subunit vii, COX9 - cytochrome c oxidase subunit viia, COX8 - cytochrome c oxidase subunit viii]
YAL047W-A		YPR001W	-2.59627	-4.22546	4.93e-95	3.07e-162		GO:0005353	fructose transmembrane transporter activity	0.000856	0.0647	8.67	5550	13	197	4	[HXT13 - hxt13p, HXT3 - hxt3p, HXT6 - hxt6p, HXT17 - hxt17p]
YAL048C		YDR453C	0.726176	1.05267	0.00738037	9.51e-05		GO:0015405	P-P-bond-hydrolysis-driven transmembrane transporter activity	0.000913	0.067	3.52	5550	72	197	9	[ATP20 - atp20p, AUS1 - atp-binding cassette sterol transporter aus1, ATP1 - f1f0 atp synthase subunit alpha, ATP19 - atp19p, PDR11 - atp-binding cassette multidrug transporter pdr11, PDR12 - atp-binding cassette multidrug transporter pdr12, PXA1 - atp-binding cassette long-chain fatty acid transporter pxa1, ATP18 - atp18p, ATP15 - f1f0 atp synthase subunit epsilon]
YAL049C		YJL154C	0.662821	0.817993	9.41e-08	3.25e-11		GO:0030312	external encapsulating structure	3.73e-15	3.94e-12	6.34	5550	120	197	27	[BAR1 - bar1p, SCW11 - scw11p, YJL171C - hypothetical protein, PAU7 - pau7p, YLR040C - hypothetical protein, KNH1 - knh1p, PAU23 - pau23p, TIR3 - tir3p, SCW4 - scw4p, YLR042C - hypothetical protein, PIR1 - pir1p, ZPS1 - zps1p, TIR1 - tir1p, TDH1 - tdh1p, DSE4 - dse4p, DAN1 - dan1p, FIT1 - fit1p, UTR2 - utr2p, SPS100 - sps100p, SRL1 - srl1p, EXG1 - exg1p, PAU17 - pau17p, FLO11 - flo11p, CWP1 - cwp…
YAL051W		YGR224W	0.730614	0.764745	0.00362029	0.0022802		GO:0005618	cell wall	3.73e-15	1.97e-12	6.34	5550	120	197	27	[BAR1 - bar1p, SCW11 - scw11p, YJL171C - hypothetical protein, PAU7 - pau7p, YLR040C - hypothetical protein, KNH1 - knh1p, PAU23 - pau23p, TIR3 - tir3p, SCW4 - scw4p, YLR042C - hypothetical protein, PIR1 - pir1p, ZPS1 - zps1p, TIR1 - tir1p, TDH1 - tdh1p, DSE4 - dse4p, DAN1 - dan1p, FIT1 - fit1p, UTR2 - utr2p, SPS100 - sps100p, SRL1 - srl1p, EXG1 - exg1p, PAU17 - pau17p, FLO11 - flo11p, CWP1 - cwp…
YAL053W		YML042W	-1.48465	-1.71675	2.54e-22	5.11e-29		GO:0009277	fungal-type cell wall	1.39e-14	4.9e-12	6.31	5550	116	197	26	[BAR1 - bar1p, SCW11 - scw11p, YJL171C - hypothetical protein, PAU7 - pau7p, YLR040C - hypothetical protein, KNH1 - knh1p, PAU23 - pau23p, TIR3 - tir3p, SCW4 - scw4p, YLR042C - hypothetical protein, PIR1 - pir1p, ZPS1 - zps1p, TIR1 - tir1p, TDH1 - tdh1p, DSE4 - dse4p, DAN1 - dan1p, FIT1 - fit1p, UTR2 - utr2p, SPS100 - sps100p, SRL1 - srl1p, EXG1 - exg1p, PAU17 - pau17p, CWP1 - cwp1p, TIR4 - tir4p…
YAL054C		YPR035W	-0.826443	-0.886258	0.00206809	0.000956623		GO:0005576	extracellular region	3.31e-14	8.75e-12	6.4	5550	110	197	25	[BAR1 - bar1p, SCW11 - scw11p, ICL1 - isocitrate lyase 1, YLR040C - hypothetical protein, KNH1 - knh1p, PAU23 - pau23p, TIR3 - tir3p, SCW4 - scw4p, YLR042C - hypothetical protein, PIR1 - pir1p, ZPS1 - zps1p, TIR1 - tir1p, PGU1 - pgu1p, DSE4 - dse4p, DAN1 - dan1p, FIT1 - fit1p, UTR2 - utr2p, SRL1 - srl1p, EXG1 - exg1p, FLO11 - flo11p, CWP1 - cwp1p, TIR4 - tir4p, TIR2 - tir2p, SUC2 - beta-fructofur…
YAL055W		YNR002C	-1.0002	-3.26891	4.22e-15	5.15e-137		GO:0071944	cell periphery	2.94e-11	6.22e-09	3.6	5550	266	197	34	[RSN1 - rsn1p, BAR1 - bar1p, SCW11 - scw11p, PDR12 - atp-binding cassette multidrug transporter pdr12, ITR1 - itr1p, PDR11 - atp-binding cassette multidrug transporter pdr11, YCL048W-A - hypothetical protein, YLR040C - hypothetical protein, TIR3 - tir3p, YLR042C - hypothetical protein, FET4 - fet4p, ZPS1 - zps1p, RSB1 - phospholipid-translocating atpase rsb1, HXT3 - hxt3p, HXT6 - hxt6p, TIR1 - ti…
YAL056C-A		YDL121C	-0.60898	-0.717907	0.000632802	6.02e-05		GO:0031225	anchored component of membrane	4.57e-09	8.05e-07	6.5	5550	65	197	15	[FIT1 - fit1p, UTR2 - utr2p, YJL171C - hypothetical protein, YCL048W-A - hypothetical protein, YLR040C - hypothetical protein, TIR3 - tir3p, FLO11 - flo11p, CWP1 - cwp1p, YLR042C - hypothetical protein, TIR4 - tir4p, TIR2 - tir2p, TIR1 - tir1p, YHR214W - hypothetical protein, FIT3 - fit3p, DAN1 - dan1p]
YAL056W		YJL188C	-0.5912	-0.986371	0.00126919	1.02e-07		GO:0000322	storage vacuole	6.05e-09	9.13e-07	3.25	5550	260	197	30	[ITR1 - itr1p, YCL048W-A - hypothetical protein, KNH1 - knh1p, PAU23 - pau23p, TIR3 - tir3p, FET4 - fet4p, SCW4 - scw4p, YLR042C - hypothetical protein, IZH4 - izh4p, ZPS1 - zps1p, RSB1 - phospholipid-translocating atpase rsb1, TIR1 - tir1p, HXT17 - hxt17p, YMR244W - hypothetical protein, FRE3 - fre3p, DIP5 - dip5p, IZH2 - izh2p, SRL1 - srl1p, PRM5 - prm5p, EXG1 - exg1p, ATO2 - ato2p, PAU17 - pau…
YAL058W		YHL010C	0.75734	0.857822	0.000115476	1.11e-05		GO:0000324	fungal-type vacuole	6.05e-09	7.99e-07	3.25	5550	260	197	30	[ITR1 - itr1p, YCL048W-A - hypothetical protein, KNH1 - knh1p, PAU23 - pau23p, TIR3 - tir3p, FET4 - fet4p, SCW4 - scw4p, YLR042C - hypothetical protein, IZH4 - izh4p, ZPS1 - zps1p, RSB1 - phospholipid-translocating atpase rsb1, TIR1 - tir1p, HXT17 - hxt17p, YMR244W - hypothetical protein, FRE3 - fre3p, DIP5 - dip5p, IZH2 - izh2p, SRL1 - srl1p, PRM5 - prm5p, EXG1 - exg1p, ATO2 - ato2p, PAU17 - pau…
YAL059W		snR42	-0.862936	-0.903871	0.000364691	0.00019943		GO:0031224	intrinsic component of membrane	6.67e-09	7.83e-07	1.76	5550	1326	197	83	[RSN1 - rsn1p, WSC4 - wsc4p, AGP2 - agp2p, PDR11 - atp-binding cassette multidrug transporter pdr11, ITR1 - itr1p, COX7 - cytochrome c oxidase subunit vii, PDR12 - atp-binding cassette multidrug transporter pdr12, YCL048W-A - hypothetical protein, YLR040C - hypothetical protein, PHO89 - pho89p, YDR089W - hypothetical protein, TIR3 - tir3p, YLR042C - hypothetical protein, IZH4 - izh4p, RSB1 - phos…
YAL060W		YPL147W	-0.836341	-0.64375	0.000204852	0.00410761		GO:0000323	lytic vacuole	7.95e-09	8.4e-07	3.21	5550	263	197	30	[ITR1 - itr1p, YCL048W-A - hypothetical protein, KNH1 - knh1p, PAU23 - pau23p, TIR3 - tir3p, FET4 - fet4p, SCW4 - scw4p, YLR042C - hypothetical protein, IZH4 - izh4p, ZPS1 - zps1p, RSB1 - phospholipid-translocating atpase rsb1, TIR1 - tir1p, HXT17 - hxt17p, YMR244W - hypothetical protein, FRE3 - fre3p, DIP5 - dip5p, IZH2 - izh2p, SRL1 - srl1p, PRM5 - prm5p, EXG1 - exg1p, ATO2 - ato2p, PAU17 - pau…
YAL061W		YJL016W	1.15448	0.972212	1.03e-08	1.53e-06		GO:0044425	membrane part	1.68e-07	1.61e-05	1.6	5550	1589	197	90	[RSN1 - rsn1p, WSC4 - wsc4p, AGP2 - agp2p, PDR11 - atp-binding cassette multidrug transporter pdr11, COX7 - cytochrome c oxidase subunit vii, PDR12 - atp-binding cassette multidrug transporter pdr12, ITR1 - itr1p, YCL048W-A - hypothetical protein, YLR040C - hypothetical protein, PHO89 - pho89p, YDR089W - hypothetical protein, TIR3 - tir3p, YLR042C - hypothetical protein, IZH4 - izh4p, RSB1 - phos…
YAL062W		YKL141W	-0.648403	-1.01592	7.55e-06	2.48e-12		GO:0005773	vacuole	4.88e-07	4.3e-05	2.48	5550	386	197	34	[ICL1 - isocitrate lyase 1, ITR1 - itr1p, YCL048W-A - hypothetical protein, PAU23 - pau23p, KNH1 - knh1p, TIR3 - tir3p, ADY2 - ady2p, FET4 - fet4p, YLR042C - hypothetical protein, SCW4 - scw4p, IZH4 - izh4p, ZPS1 - zps1p, RSB1 - phospholipid-translocating atpase rsb1, TIR1 - tir1p, HXT17 - hxt17p, YMR244W - hypothetical protein, FRE3 - fre3p, IZH2 - izh2p, YGR066C - hypothetical protein, DIP5 - d…
YAL063C		YNL009W	-1.13134	-0.994554	9.22e-09	3.63e-07		GO:0005886	plasma membrane	2.83e-05	0.0023	2.04	5550	483	197	35	[HXT13 - hxt13p, RSN1 - rsn1p, YJL171C - hypothetical protein, PDR11 - atp-binding cassette multidrug transporter pdr11, PDR12 - atp-binding cassette multidrug transporter pdr12, ITR1 - itr1p, YCL048W-A - hypothetical protein, PHO89 - pho89p, AHP1 - ahp1p, ADY2 - ady2p, FET4 - fet4p, RSB1 - phospholipid-translocating atpase rsb1, SSA3 - hsp70 family atpase ssa3, HXT3 - hxt3p, HXT6 - hxt6p, HXT17 …
YAL064W-B		YPR010C-A	-1.2528	-0.910217	2.43e-10	3.57e-06		GO:0016020	membrane	2.84e-05	0.00214	1.41	5550	1904	197	95	[RSN1 - rsn1p, WSC4 - wsc4p, AGP2 - agp2p, PDR11 - atp-binding cassette multidrug transporter pdr11, COX7 - cytochrome c oxidase subunit vii, PDR12 - atp-binding cassette multidrug transporter pdr12, ITR1 - itr1p, YCL048W-A - hypothetical protein, YLR040C - hypothetical protein, PHO89 - pho89p, YDR089W - hypothetical protein, TIR3 - tir3p, YLR042C - hypothetical protein, IZH4 - izh4p, RSB1 - phos…
YAL065C		YPR036W-A	-1.15615	-1.4925	6.56e-16	6.69e-25		GO:0098800	inner mitochondrial membrane protein complex	3.86e-05	0.00272	4.3	5550	72	197	11	[ATP20 - atp20p, QCR9 - ubiquinol--cytochrome-c reductase subunit 9, SDH3 - succinate dehydrogenase cytochrome b subunit sdh3, COX6 - cytochrome c oxidase subunit vi, ATP1 - f1f0 atp synthase subunit alpha, ATP19 - atp19p, COX7 - cytochrome c oxidase subunit vii, ATP18 - atp18p, SDH4 - succinate dehydrogenase membrane anchor subunit sdh4, ATP15 - f1f0 atp synthase subunit epsilon, SHH4 - protein …
YAL067C		YMR090W	0.69758	1.16217	1.52e-05	3.79e-13		GO:0005739	mitochondrion	4.08e-05	0.00269	1.6	5550	1091	197	62	[COX7 - cytochrome c oxidase subunit vii, ACH1 - ach1p, ATP19 - atp19p, ATP18 - atp18p, HXT6 - hxt6p, ACN9 - acn9p, BAT2 - bat2p, FUM1 - fumarase fum1, FMP43 - fmp43p, SPG1 - spg1p, URA2 - ura2p, COX6 - cytochrome c oxidase subunit vi, IDP3 - isocitrate dehydrogenase (nadp(+)) idp3, CIT1 - citrate (si)-synthase cit1, MRPL44 - mitochondrial 54s ribosomal protein yml44, UPS2 - ups2p, ATO2 - ato2p, …
YAL068C		YLR053C	-1.37131	-2.03004	0.00387534	7.88e-05		GO:0009986	cell surface	4.74e-05	0.00295	8.45	5550	20	197	6	[ZPS1 - zps1p, SCW11 - scw11p, SRL1 - srl1p, EXG1 - exg1p, DSE4 - dse4p, SCW4 - scw4p]
YAR002C-A		YEL066W	-0.745487	-0.699003	1.92e-08	1.21e-07		GO:0016021	integral component of membrane	8.85e-05	0.0052	1.52	5550	1264	197	68	[RSN1 - rsn1p, WSC4 - wsc4p, AGP2 - agp2p, PDR11 - atp-binding cassette multidrug transporter pdr11, ITR1 - itr1p, COX7 - cytochrome c oxidase subunit vii, PDR12 - atp-binding cassette multidrug transporter pdr12, PHO89 - pho89p, YDR089W - hypothetical protein, IZH4 - izh4p, RSB1 - phospholipid-translocating atpase rsb1, SNA2 - sna2p, HXT3 - hxt3p, ATP19 - atp19p, HXT6 - hxt6p, ATP18 - atp18p, HX…
YAR002W		YIL045W	-0.842356	0.802053	0.000545276	0.000780184		GO:0044429	mitochondrial part	0.000106	0.00589	1.81	5550	621	197	40	[ICL2 - methylisocitrate lyase icl2, CIT2 - citrate (si)-synthase cit2, COX7 - cytochrome c oxidase subunit vii, MIR1 - mir1p, COX8 - cytochrome c oxidase subunit viii, RMA1 - putative tetrahydrofolate synthase, ATP20 - atp20p, QCR9 - ubiquinol--cytochrome-c reductase subunit 9, SDH3 - succinate dehydrogenase cytochrome b subunit sdh3, CPR1 - peptidylprolyl isomerase cpr1, ATP19 - atp19p, CAT2 - …
YAR003W		YKR009C	-0.813399	-0.687932	0.000313448	0.00228567		GO:0005743	mitochondrial inner membrane	0.000129	0.00683	2.49	5550	226	197	20	[FMP43 - fmp43p, COX6 - cytochrome c oxidase subunit vi, COX7 - cytochrome c oxidase subunit vii, MIR1 - mir1p, UPS2 - ups2p, ATP15 - f1f0 atp synthase subunit epsilon, COX8 - cytochrome c oxidase subunit viii, SHH4 - protein shh4, QCR9 - ubiquinol--cytochrome-c reductase subunit 9, ODC1 - odc1p, SDH3 - succinate dehydrogenase cytochrome b subunit sdh3, GUT2 - glycerol-3-phosphate dehydrogenase, …
YAR007C		YGR279C	-0.628992	-1.08916	2.9e-17	3.05e-48		GO:0098803	respiratory chain complex	0.000146	0.00735	7.04	5550	24	197	6	[QCR9 - ubiquinol--cytochrome-c reductase subunit 9, SDH3 - succinate dehydrogenase cytochrome b subunit sdh3, COX6 - cytochrome c oxidase subunit vi, COX7 - cytochrome c oxidase subunit vii, SDH4 - succinate dehydrogenase membrane anchor subunit sdh4, SHH4 - protein shh4]
YAR008W		YJR122W	-0.662207	-1.02845	6.27e-05	1.01e-09		GO:0019866	organelle inner membrane	0.000247	0.0118	2.38	5550	237	197	20	[FMP43 - fmp43p, COX6 - cytochrome c oxidase subunit vi, COX7 - cytochrome c oxidase subunit vii, MIR1 - mir1p, UPS2 - ups2p, ATP15 - f1f0 atp synthase subunit epsilon, COX8 - cytochrome c oxidase subunit viii, SHH4 - protein shh4, QCR9 - ubiquinol--cytochrome-c reductase subunit 9, ODC1 - odc1p, SDH3 - succinate dehydrogenase cytochrome b subunit sdh3, GUT2 - glycerol-3-phosphate dehydrogenase, …
YAR009C		YKL187C	0.820194	-0.918858	3.13e-05	4.13e-06		GO:0044455	mitochondrial membrane part	0.000333	0.0153	2.64	5550	171	197	16	[FMP43 - fmp43p, COX6 - cytochrome c oxidase subunit vi, COX7 - cytochrome c oxidase subunit vii, UPS2 - ups2p, MIR1 - mir1p, ATP15 - f1f0 atp synthase subunit epsilon, SHH4 - protein shh4, ATP20 - atp20p, QCR9 - ubiquinol--cytochrome-c reductase subunit 9, SDH3 - succinate dehydrogenase cytochrome b subunit sdh3, GUT2 - glycerol-3-phosphate dehydrogenase, ATP1 - f1f0 atp synthase subunit alpha, …
YAR010C		YJR148W	-1.31269	-1.16345	1.57e-28	7.09e-23		GO:0031966	mitochondrial membrane	0.000468	0.0206	2	5550	366	197	26	[COX7 - cytochrome c oxidase subunit vii, MIR1 - mir1p, COX8 - cytochrome c oxidase subunit viii, ATP20 - atp20p, QCR9 - ubiquinol--cytochrome-c reductase subunit 9, SDH3 - succinate dehydrogenase cytochrome b subunit sdh3, ATP19 - atp19p, ATP18 - atp18p, CAT2 - carnitine o-acetyltransferase cat2, FMP43 - fmp43p, SPG1 - spg1p, COX6 - cytochrome c oxidase subunit vi, UPS2 - ups2p, ATP15 - f1f0 atp…
YAR014C		YMR225C	-0.590856	-0.590199	0.00161765	0.00162443		GO:0005887	integral component of plasma membrane	0.000826	0.0349	3.07	5550	101	197	11	[HXT13 - hxt13p, AZR1 - azr1p, AGP2 - agp2p, HXT3 - hxt3p, ITR1 - itr1p, HXT6 - hxt6p, PHO89 - pho89p, HXT17 - hxt17p, ZRT1 - high-affinity zn(2+) transporter zrt1, FET4 - fet4p, CTR3 - ctr3p]
YAR015W		YKL062W	0.66781	0.632318	2.37e-05	6.33e-05
YAR018C		YER092W	-0.668095	-0.756341	6.03e-05	6.29e-06
YAR019C		YMR107W	-1.07453	-1.77685	0.000325677	3.53e-09
YAR020C		YJR077C	-0.728823	-1.02746	1.04e-07	6.69e-14
YAR023C		YMR034C	-1.03044	-0.983374	5.75e-06	1.48e-05
YAR027W		YJL052W	-1.44327	-0.821661	1.28e-06	0.00581698
YAR028W		YER065C	-1.05196	1.0253	3.9e-11	1.1e-10
YAR029W		YDR343C	-1.61016	-1.3547	6.41e-32	3.29e-23
YAR030C		YDR345C	-0.759603	-0.862744	0.00130471	0.00026527
YAR031W		YPL135W	-0.59226	-0.716308	0.00229729	0.000229302
YAR033W		YGR183C	-0.70583	-0.59148	2.44e-05	0.000388532
YAR035W		YLR395C	-0.920294	-0.892843	5.73e-08	1.35e-07
YAR042W		YFL030W	-1.39725	-1.14032	9.16e-12	2.58e-08
YAR050W		YDR171W	-1.16079	0.909681	3.67e-06	0.000250871
YAR066W		YCL026C-B	-1.09469	0.796092	3.5e-08	1.51e-06
YAR068W		YOR100C	-0.94477	-2.72384	9.48e-25	6.31e-159
YAR070C		YPL271W	-0.791659	-0.84079	4.21e-07	8.24e-08
YAR071W		YPR006C	-1.89381	-2.43306	1.83e-33	3.6e-52
YAR073W		YML081C-A	-1.19345	-0.689823	2.53e-08	0.000896544
YBL001C		YGL062W	-0.660588	-0.644865	2.66e-15	1.17e-14
YBL002W		YBR157C	0.892714	-1.88222	8.73e-16	1.35e-41
YBL003C		YDR511W	-0.728275	-0.821988	2.23e-05	1.88e-06
YBL004W		YNL202W	-1.07782	-0.788119	1.42e-09	7.94e-06
YBL005W		YOR327C	-0.869974	-0.587363	7.47e-11	9.07e-06
YBL005W-B		YOR049C	-3.35454	-1.09082	3.36e-50	2.94e-08
YBL006C		YML058W	-0.727207	-0.76443	1.38e-12	9.61e-14
YBL007C		YMR256C	-1.3872	-0.734866	2.18e-14	2.35e-05
YBL008W		YGR243W	-1.05009	-1.22487	1.34e-23	3.94e-31
YBL009W		YDL067C	-0.815851	-0.948706	3.53e-08	2.44e-10
YBL010C		YPL134C	-0.934382	-1.04146	2.77e-16	8.46e-20
YBL011W		YNR001C	-0.973334	-1.16865	7.75e-09	4.24e-12
YBL012C		YKL138C-A	-0.858854	-0.840076	0.0085501	0.0097944
YBL013W		YFL052W	-0.716422	0.870032	6.57e-06	1.17e-08
YBL014C		YDR178W	-1.14668	-1.19239	1.34e-09	2.91e-10
YBL015W		YPR124W	-0.812502	-0.925019	0.000242016	2.97e-05
YBL016W		YGL253W	-0.687349	-1.16353	1.59e-05	3.51e-13
YBL017C		YBL042C	-1.55529	-1.2196	0.000315061	0.00468294
YBL018C		YLR168C	-0.597334	-0.788564	4.85e-08	9.27e-13
YBL019W		YHR051W	-0.985666	-0.653549	1.79e-24	9.78e-12
YBL020W		YER062C	-0.845843	-0.94845	1.13e-07	2.91e-09
YBL021C		YPL201C	-1.61095	-1.51762	6.69e-10	5.6e-09
YBL022C		YKL096W	1.65951	-5.17257	5.04e-16	9.83e-86
YBL023C		YBL015W	-1.06866	-1.08805	1.16e-13	4.18e-14
YBL024W		YOL077W-A	-1.15669	-0.808576	2.53e-12	5.86e-07
YBL025W		YPL026C	-0.819685	-0.710475	0.000105036	0.000759893
YBL026W		YBL099W	-0.761988	-0.656633	1.7e-05	0.000209963
YBL027W		YPR020W	-0.780758	-0.695258	1.64e-05	0.000120281
YBL028C		YER130C	-0.597165	1.0682	0.000247627	5.25e-12
YBL029C-A		YPL223C	0.869208	-1.44497	3.52e-05	7.65e-12
YBL029W		YLR411W	-0.845775	-1.51916	0.000336292	1.33e-10
YBL030C		YLR420W	-1.06955	-0.668243	2.58e-17	7.46e-08
YBL031W		YPL262W	-0.590901	-0.853762	0.00208505	8.81e-06
YBL032W		YEL040W	-0.78609	-3.06825	2.47e-07	1.49e-73
YBL033C		YPR061C	-1.27212	-1.32128	1.64e-17	1.1e-18
YBL034C		YJL130C	-1.19734	-1.44158	9.14e-05	2.49e-06
YBL035C		YLR164W	0.634421	-1.58279	0.00513754	8.28e-11
YBL036C		YML090W	-2.05533	-1.70811	5.12e-07	1.11e-05
YBL037W		YGR236C	-1.58075	-0.878211	1.95e-06	0.00718597
YBL038W		YBR183W	-0.878769	0.965862	5.88e-05	6.74e-06
YBL039C		YHR139C	1.35747	-0.939034	4.25e-07	0.000522854
YBL039W-B		YML089C	-2.40102	-1.03119	2.53e-13	0.000165869
YBL040C		YBL075C	-0.605991	-1.57734	0.000245428	2.73e-21
YBL041W		YML122C	-1.6026	-2.80494	0.000593006	2.55e-07
YBL042C		YPL058C	-1.48173	-1.95874	3.17e-11	1.91e-18
YBL043W		YNR034W-A	-0.77492	1.1567	0.00592639	3.68e-05
YBL044W		YNR067C	0.815394	1.0557	6.08e-06	3.56e-09
YBL045C		YDR534C	-1.42577	-1.09948	0.000659811	0.00821805
YBL046W		YDL218W	3.30504	-0.919918	3.12e-35	0.00094206
YBL047C		YOR381W	-1.63459	-2.06168	0.000583226	1.51e-05
YBL048W		YOL143C	-1.92322	-0.785934	8.25e-41	2.05e-08
YBL049W		YOR383C	-1.98039	-2.59561	2.62e-06	7.46e-10
YBL050W		YCL048W-A	1.96424	-4.42373	1.78e-08	3.46e-19
YBL051C
YBL052C
YBL053W
YBL054W
YBL055C
YBL056W
YBL057C
YBL058W
YBL059C-A
YBL059W
YBL060W
YBL061C
YBL063W
YBL064C
YBL065W
YBL066C
YBL067C
YBL068W
YBL069W
YBL070C
YBL071C
YBL071W-A
YBL072C
YBL073W
YBL074C
YBL075C
YBL076C
YBL077W
YBL078C
YBL079W
YBL080C
YBL081W
YBL082C
YBL083C
YBL084C
YBL085W
YBL086C
YBL087C
YBL088C
YBL089W
YBL090W
YBL091C
YBL091C-A
YBL092W
YBL093C
YBL095W
YBL096C
YBL097W
YBL098W
YBL099W
YBL100C
YBL100W-B
YBL101C
YBL102W
YBL103C
YBL104C
YBL105C
YBL106C
YBL107C
YBL109W
YBL113C
YBR001C
YBR002C
YBR003W
YBR004C
YBR005W
YBR006W
YBR007C
YBR008C
YBR009C
YBR010W
YBR011C
YBR012C
YBR012W-B
YBR013C
YBR014C
YBR015C
YBR016W
YBR017C
YBR018C
YBR019C
YBR020W
YBR021W
YBR022W
YBR023C
YBR024W
YBR025C
YBR026C
YBR028C
YBR029C
YBR030W
YBR031W
YBR032W
YBR033W
YBR034C
YBR035C
YBR036C
YBR037C
YBR038W
YBR039W
YBR040W
YBR041W
YBR042C
YBR043C
YBR044C
YBR045C
YBR046C
YBR047W
YBR048W
YBR049C
YBR050C
YBR051W
YBR052C
YBR053C
YBR054W
YBR055C
YBR056W
YBR056W-A
YBR057C
YBR058C
YBR058C-A
YBR059C
YBR060C
YBR061C
YBR062C
YBR063C
YBR065C
YBR066C
YBR067C
YBR068C
YBR069C
YBR070C
YBR071W
YBR072W
YBR073W
YBR074W
YBR076C-A
YBR076W
YBR077C
YBR078W
YBR079C
YBR080C
YBR081C
YBR082C
YBR083W
YBR084C-A
YBR084W
YBR085C-A
YBR085W
YBR086C
YBR087W
YBR088C
YBR089C-A
YBR089W
YBR090C
YBR091C
YBR092C
YBR093C
YBR094W
YBR095C
YBR096W
YBR097W
YBR098W
YBR101C
YBR102C
YBR103W
YBR104W
YBR105C
YBR106W
YBR107C
YBR108W
YBR109C
YBR109W-A
YBR110W
YBR111C
YBR111W-A
YBR112C
YBR113W
YBR114W
YBR115C
YBR116C
YBR117C
YBR118W
YBR119W
YBR120C
YBR121C
YBR122C
YBR123C
YBR124W
YBR125C
YBR126C
YBR126W-A
YBR126W-B
YBR127C
YBR128C
YBR129C
YBR130C
YBR131W
YBR132C
YBR133C
YBR134W
YBR135W
YBR136W
YBR137W
YBR138C
YBR139W
YBR140C
YBR141C
YBR142W
YBR143C
YBR145W
YBR146W
YBR147W
YBR148W
YBR149W
YBR150C
YBR151W
YBR152W
YBR153W
YBR154C
YBR155W
YBR156C
YBR157C
YBR158W
YBR159W
YBR160W
YBR161W
YBR162C
YBR162W-A
YBR163W
YBR164C
YBR165W
YBR166C
YBR167C
YBR168W
YBR169C
YBR170C
YBR171W
YBR172C
YBR173C
YBR174C
YBR175W
YBR176W
YBR177C
YBR178W
YBR179C
YBR180W
YBR181C
YBR182C
YBR183W
YBR184W
YBR185C
YBR186W
YBR187W
YBR188C
YBR189W
YBR190W
YBR191W
YBR192W
YBR193C
YBR194W
YBR195C
YBR196C
YBR197C
YBR198C
YBR199W
YBR200W
YBR200W-A
YBR201C-A
YBR201W
YBR202W
YBR203W
YBR204C
YBR205W
YBR206W
YBR207W
YBR208C
YBR209W
YBR210W
YBR211C
YBR212W
YBR213W
YBR214W
YBR215W
YBR216C
YBR217W
YBR218C
YBR220C
YBR221C
YBR222C
YBR223C
YBR224W
YBR225W
YBR226C
YBR227C
YBR228W
YBR229C
YBR230C
YBR230W-A
YBR231C
YBR232C
YBR233W
YBR233W-A
YBR234C
YBR235W
YBR236C
YBR237W
YBR238C
YBR239C
YBR240C
YBR241C
YBR242W
YBR243C
YBR244W
YBR245C
YBR246W
YBR247C
YBR248C
YBR249C
YBR250W
YBR251W
YBR252W
YBR253W
YBR254C
YBR255C-A
YBR255W
YBR256C
YBR257W
YBR258C
YBR259W
YBR260C
YBR261C
YBR262C
YBR263W
YBR264C
YBR265W
YBR267W
YBR268W
YBR269C
YBR270C
YBR271W
YBR272C
YBR273C
YBR274W
YBR275C
YBR276C
YBR277C
YBR278W
YBR279W
YBR280C
YBR281C
YBR282W
YBR283C
YBR284W
YBR285W
YBR286W
YBR287W
YBR288C
YBR289W
YBR290W
YBR291C
YBR292C
YBR293W
YBR294W
YBR295W
YBR296C
YBR296C-A
YBR297W
YBR298C
YBR301W
YCL001W
YCL001W-A
YCL001W-B
YCL002C
YCL004W
YCL005W
YCL005W-A
YCL007C
YCL008C
YCL009C
YCL010C
YCL011C
YCL012C
YCL014W
YCL016C
YCL017C
YCL018W
YCL019W
YCL021W-A
YCL023C
YCL024W
YCL025C
YCL026C-A
YCL026C-B
YCL027W
YCL028W
YCL029C
YCL030C
YCL031C
YCL032W
YCL033C
YCL034W
YCL035C
YCL036W
YCL037C
YCL038C
YCL039W
YCL040W
YCL041C
YCL042W
YCL043C
YCL044C
YCL045C
YCL046W
YCL047C
YCL048W
YCL048W-A
YCL049C
YCL050C
YCL051W
YCL052C
YCL054W
YCL055W
YCL056C
YCL057C-A
YCL057W
YCL058C
YCL059C
YCL061C
YCL063W
YCL064C
YCL069W
YCL073C
YCR001W
YCR002C
YCR003W
YCR004C
YCR005C
YCR006C
YCR007C
YCR008W
YCR009C
YCR010C
YCR011C
YCR012W
YCR013C
YCR014C
YCR015C
YCR016W
YCR017C
YCR018C
YCR018C-A
YCR019W
YCR020C
YCR020C-A
YCR020W-B
YCR021C
YCR022C
YCR023C
YCR024C
YCR024C-A
YCR024C-B
YCR025C
YCR026C
YCR027C
YCR028C
YCR028C-A
YCR030C
YCR031C
YCR032W
YCR033W
YCR034W
YCR035C
YCR036W
YCR037C
YCR038C
YCR041W
YCR042C
YCR043C
YCR044C
YCR045C
YCR046C
YCR047C
YCR048W
YCR049C
YCR050C
YCR051W
YCR052W
YCR053W
YCR054C
YCR057C
YCR059C
YCR060W
YCR061W
YCR063W
YCR064C
YCR065W
YCR066W
YCR067C
YCR068W
YCR069W
YCR071C
YCR072C
YCR073C
YCR073W-A
YCR075C
YCR075W-A
YCR076C
YCR077C
YCR079W
YCR081W
YCR082W
YCR083W
YCR084C
YCR085W
YCR086W
YCR087W
YCR088W
YCR089W
YCR090C
YCR091W
YCR092C
YCR093W
YCR094W
YCR095C
YCR097W
YCR098C
YCR099C
YCR100C
YCR101C
YCR102C
YCR104W
YCR105W
YCR106W
YCR107W
YDL001W
YDL002C
YDL003W
YDL004W
YDL005C
YDL006W
YDL007W
YDL008W
YDL009C
YDL010W
YDL011C
YDL012C
YDL013W
YDL014W
YDL015C
YDL016C
YDL017W
YDL018C
YDL019C
YDL020C
YDL021W
YDL022C-A
YDL022W
YDL023C
YDL024C
YDL025C
YDL026W
YDL027C
YDL028C
YDL029W
YDL030W
YDL031W
YDL032W
YDL033C
YDL034W
YDL035C
YDL036C
YDL037C
YDL039C
YDL040C
YDL042C
YDL043C
YDL044C
YDL045C
YDL045W-A
YDL046W
YDL047W
YDL048C
YDL049C
YDL050C
YDL051W
YDL052C
YDL053C
YDL054C
YDL055C
YDL056W
YDL057W
YDL058W
YDL059C
YDL060W
YDL061C
YDL062W
YDL063C
YDL064W
YDL065C
YDL066W
YDL067C
YDL068W
YDL069C
YDL070W
YDL071C
YDL072C
YDL073W
YDL074C
YDL075W
YDL076C
YDL077C
YDL078C
YDL079C
YDL080C
YDL081C
YDL082W
YDL083C
YDL084W
YDL085C-A
YDL085W
YDL086W
YDL087C
YDL088C
YDL089W
YDL090C
YDL091C
YDL092W
YDL093W
YDL094C
YDL095W
YDL096C
YDL097C
YDL098C
YDL099W
YDL100C
YDL101C
YDL102W
YDL103C
YDL104C
YDL105W
YDL106C
YDL107W
YDL108W
YDL109C
YDL110C
YDL111C
YDL112W
YDL113C
YDL114W
YDL115C
YDL116W
YDL117W
YDL118W
YDL119C
YDL120W
YDL121C
YDL122W
YDL123W
YDL124W
YDL125C
YDL126C
YDL127W
YDL128W
YDL129W
YDL130W
YDL130W-A
YDL131W
YDL132W
YDL133C-A
YDL133W
YDL134C
YDL135C
YDL136W
YDL137W
YDL138W
YDL139C
YDL140C
YDL141W
YDL142C
YDL143W
YDL144C
YDL145C
YDL146W
YDL147W
YDL148C
YDL149W
YDL150W
YDL151C
YDL152W
YDL153C
YDL154W
YDL155W
YDL156W
YDL157C
YDL158C
YDL159W
YDL160C
YDL160C-A
YDL161W
YDL164C
YDL165W
YDL166C
YDL167C
YDL168W
YDL169C
YDL170W
YDL171C
YDL173W
YDL174C
YDL175C
YDL176W
YDL177C
YDL178W
YDL179W
YDL180W
YDL181W
YDL182W
YDL183C
YDL184C
YDL185C-A
YDL185W
YDL186W
YDL187C
YDL188C
YDL189W
YDL190C
YDL191W
YDL192W
YDL193W
YDL194W
YDL195W
YDL197C
YDL198C
YDL199C
YDL200C
YDL201W
YDL202W
YDL203C
YDL204W
YDL205C
YDL206W
YDL207W
YDL208W
YDL209C
YDL210W
YDL211C
YDL212W
YDL213C
YDL214C
YDL215C
YDL216C
YDL217C
YDL218W
YDL219W
YDL220C
YDL221W
YDL222C
YDL223C
YDL224C
YDL225W
YDL226C
YDL227C
YDL228C
YDL229W
YDL230W
YDL231C
YDL232W
YDL233W
YDL234C
YDL235C
YDL236W
YDL237W
YDL238C
YDL239C
YDL240W
YDL241W
YDL242W
YDL243C
YDL244W
YDL245C
YDL246C
YDL247W
YDL248W
YDR001C
YDR002W
YDR003W
YDR003W-A
YDR004W
YDR005C
YDR006C
YDR007W
YDR008C
YDR009W
YDR010C
YDR011W
YDR012W
YDR013W
YDR014W
YDR014W-A
YDR016C
YDR017C
YDR018C
YDR019C
YDR020C
YDR021W
YDR022C
YDR023W
YDR025W
YDR026C
YDR027C
YDR028C
YDR029W
YDR030C
YDR031W
YDR032C
YDR033W
YDR034C
YDR034C-A
YDR034C-D
YDR034W-B
YDR035W
YDR036C
YDR037W
YDR038C
YDR040C
YDR041W
YDR042C
YDR043C
YDR044W
YDR045C
YDR046C
YDR047W
YDR048C
YDR049W
YDR050C
YDR051C
YDR052C
YDR053W
YDR054C
YDR055W
YDR056C
YDR057W
YDR058C
YDR059C
YDR060W
YDR061W
YDR062W
YDR063W
YDR064W
YDR065W
YDR066C
YDR067C
YDR068W
YDR069C
YDR070C
YDR071C
YDR072C
YDR073W
YDR074W
YDR075W
YDR076W
YDR077W
YDR078C
YDR079C-A
YDR079W
YDR080W
YDR081C
YDR082W
YDR083W
YDR084C
YDR085C
YDR086C
YDR087C
YDR088C
YDR089W
YDR090C
YDR091C
YDR092W
YDR093W
YDR094W
YDR096W
YDR097C
YDR098C
YDR099W
YDR100W
YDR101C
YDR103W
YDR104C
YDR105C
YDR106W
YDR107C
YDR108W
YDR109C
YDR110W
YDR111C
YDR112W
YDR113C
YDR114C
YDR115W
YDR116C
YDR117C
YDR118W
YDR119W
YDR119W-A
YDR120C
YDR121W
YDR122W
YDR123C
YDR124W
YDR125C
YDR126W
YDR127W
YDR128W
YDR129C
YDR130C
YDR131C
YDR132C
YDR133C
YDR134C
YDR135C
YDR136C
YDR137W
YDR138W
YDR139C
YDR140W
YDR141C
YDR142C
YDR143C
YDR144C
YDR145W
YDR146C
YDR147W
YDR148C
YDR149C
YDR150W
YDR151C
YDR152W
YDR153C
YDR154C
YDR155C
YDR156W
YDR157W
YDR158W
YDR159W
YDR160W
YDR161W
YDR162C
YDR163W
YDR164C
YDR165W
YDR166C
YDR167W
YDR168W
YDR169C
YDR170C
YDR170W-A
YDR171W
YDR172W
YDR173C
YDR174W
YDR175C
YDR176W
YDR177W
YDR178W
YDR179C
YDR179W-A
YDR180W
YDR181C
YDR182W
YDR182W-A
YDR183C-A
YDR183W
YDR184C
YDR185C
YDR186C
YDR187C
YDR188W
YDR189W
YDR190C
YDR191W
YDR192C
YDR193W
YDR194C
YDR195W
YDR196C
YDR197W
YDR198C
YDR199W
YDR200C
YDR201W
YDR202C
YDR203W
YDR204W
YDR205W
YDR206W
YDR207C
YDR208W
YDR209C
YDR210C-D
YDR210W-B
YDR211W
YDR212W
YDR213W
YDR214W
YDR215C
YDR216W
YDR217C
YDR218C
YDR219C
YDR221W
YDR222W
YDR223W
YDR224C
YDR225W
YDR226W
YDR227W
YDR228C
YDR229W
YDR230W
YDR231C
YDR232W
YDR233C
YDR234W
YDR235W
YDR236C
YDR237W
YDR238C
YDR239C
YDR240C
YDR242W
YDR243C
YDR244W
YDR245W
YDR246W
YDR246W-A
YDR247W
YDR248C
YDR249C
YDR251W
YDR252W
YDR253C
YDR254W
YDR255C
YDR256C
YDR257C
YDR258C
YDR259C
YDR260C
YDR261C
YDR261C-D
YDR261W-A
YDR261W-B
YDR262W
YDR263C
YDR264C
YDR265W
YDR266C
YDR267C
YDR268W
YDR269C
YDR270W
YDR271C
YDR272W
YDR273W
YDR274C
YDR275W
YDR276C
YDR277C
YDR279W
YDR280W
YDR281C
YDR282C
YDR283C
YDR284C
YDR285W
YDR286C
YDR287W
YDR288W
YDR289C
YDR290W
YDR291W
YDR292C
YDR293C
YDR294C
YDR295C
YDR296W
YDR297W
YDR298C
YDR299W
YDR300C
YDR301W
YDR302W
YDR303C
YDR304C
YDR305C
YDR306C
YDR307W
YDR308C
YDR309C
YDR310C
YDR311W
YDR312W
YDR313C
YDR314C
YDR315C
YDR316W
YDR317W
YDR318W
YDR319C
YDR320C
YDR320C-A
YDR321W
YDR322C-A
YDR322W
YDR323C
YDR324C
YDR325W
YDR326C
YDR327W
YDR328C
YDR329C
YDR330W
YDR331W
YDR332W
YDR333C
YDR334W
YDR335W
YDR336W
YDR337W
YDR338C
YDR339C
YDR340W
YDR341C
YDR342C
YDR343C
YDR344C
YDR345C
YDR346C
YDR347W
YDR348C
YDR349C
YDR350C
YDR351W
YDR352W
YDR353W
YDR354W
YDR355C
YDR356W
YDR357C
YDR358W
YDR359C
YDR360W
YDR361C
YDR362C
YDR363W
YDR363W-A
YDR364C
YDR365C
YDR365W-B
YDR366C
YDR367W
YDR368W
YDR369C
YDR370C
YDR371W
YDR372C
YDR373W
YDR374C
YDR374W-A
YDR375C
YDR376W
YDR377W
YDR378C
YDR379C-A
YDR379W
YDR380W
YDR381C-A
YDR381W
YDR382W
YDR383C
YDR384C
YDR385W
YDR386W
YDR387C
YDR388W
YDR389W
YDR390C
YDR391C
YDR392W
YDR393W
YDR394W
YDR395W
YDR396W
YDR397C
YDR398W
YDR399W
YDR400W
YDR402C
YDR403W
YDR404C
YDR405W
YDR406W
YDR407C
YDR408C
YDR409W
YDR410C
YDR411C
YDR412W
YDR413C
YDR414C
YDR415C
YDR416W
YDR417C
YDR418W
YDR419W
YDR420W
YDR421W
YDR422C
YDR423C
YDR424C
YDR425W
YDR426C
YDR427W
YDR428C
YDR429C
YDR430C
YDR431W
YDR432W
YDR433W
YDR434W
YDR435C
YDR436W
YDR437W
YDR438W
YDR439W
YDR440W
YDR441C
YDR442W
YDR443C
YDR444W
YDR445C
YDR446W
YDR447C
YDR448W
YDR449C
YDR450W
YDR451C
YDR452W
YDR453C
YDR454C
YDR455C
YDR456W
YDR457W
YDR458C
YDR459C
YDR460W
YDR461C-A
YDR461W
YDR462W
YDR463W
YDR464W
YDR465C
YDR466W
YDR467C
YDR468C
YDR469W
YDR470C
YDR471W
YDR472W
YDR473C
YDR475C
YDR476C
YDR477W
YDR478W
YDR479C
YDR480W
YDR481C
YDR482C
YDR483W
YDR484W
YDR485C
YDR486C
YDR487C
YDR488C
YDR489W
YDR490C
YDR491C
YDR492W
YDR493W
YDR494W
YDR495C
YDR496C
YDR497C
YDR498C
YDR499W
YDR500C
YDR501W
YDR502C
YDR503C
YDR504C
YDR505C
YDR506C
YDR507C
YDR508C
YDR509W
YDR510C-A
YDR510W
YDR511W
YDR512C
YDR513W
YDR514C
YDR515W
YDR516C
YDR517W
YDR518W
YDR519W
YDR520C
YDR521W
YDR522C
YDR523C
YDR524C
YDR524C-B
YDR524W-C
YDR525W
YDR525W-A
YDR526C
YDR527W
YDR528W
YDR529C
YDR530C
YDR531W
YDR532C
YDR533C
YDR534C
YDR535C
YDR536W
YDR537C
YDR538W
YDR539W
YDR540C
YDR541C
YDR543C
YDR545W
YEL001C
YEL002C
YEL003W
YEL004W
YEL005C
YEL006W
YEL007W
YEL008W
YEL009C
YEL009C-A
YEL010W
YEL011W
YEL012W
YEL013W
YEL015W
YEL016C
YEL017C-A
YEL017W
YEL018C-A
YEL018W
YEL019C
YEL020C
YEL020C-B
YEL020W-A
YEL021W
YEL022W
YEL023C
YEL024W
YEL025C
YEL026W
YEL027W
YEL028W
YEL029C
YEL030C-A
YEL030W
YEL031W
YEL032W
YEL033W
YEL034C-A
YEL035C
YEL036C
YEL037C
YEL038W
YEL039C
YEL040W
YEL041W
YEL042W
YEL043W
YEL044W
YEL045C
YEL046C
YEL047C
YEL048C
YEL049W
YEL050C
YEL050W-A
YEL051W
YEL052W
YEL053C
YEL053W-A
YEL054C
YEL055C
YEL056W
YEL057C
YEL058W
YEL059C-A
YEL059W
YEL060C
YEL061C
YEL062W
YEL063C
YEL064C
YEL065W
YEL066W
YEL067C
YEL068C
YEL069C
YEL070W
YEL071W
YEL072W
YEL073C
YEL074W
YEL075W-A
YEL076C
YEL077C
YER001W
YER002W
YER003C
YER004W
YER005W
YER006C-A
YER006W
YER007C-A
YER007W
YER008C
YER009W
YER010C
YER011W
YER012W
YER013W
YER014W
YER015W
YER016W
YER017C
YER018C
YER019C-A
YER019W
YER020W
YER021W
YER022W
YER023W
YER024W
YER025W
YER026C
YER027C
YER028C
YER029C
YER030W
YER031C
YER032W
YER033C
YER034W
YER035W
YER036C
YER037W
YER038C
YER038W-A
YER039C
YER039C-A
YER040W
YER041W
YER042W
YER043C
YER044C
YER044C-A
YER045C
YER046W
YER046W-A
YER047C
YER048C
YER048W-A
YER049W
YER050C
YER051W
YER052C
YER053C
YER053C-A
YER054C
YER055C
YER056C
YER056C-A
YER057C
YER058W
YER059W
YER060W
YER060W-A
YER061C
YER062C
YER063W
YER064C
YER065C
YER066C-A
YER066W
YER067C-A
YER067W
YER068C-A
YER068W
YER069W
YER070W
YER071C
YER072W
YER073W
YER074W
YER074W-A
YER075C
YER076C
YER076W-A
YER077C
YER078C
YER079C-A
YER079W
YER080W
YER081W
YER082C
YER083C
YER084W
YER086W
YER087C-A
YER087C-B
YER087W
YER088C
YER088C-A
YER089C
YER090W
YER091C
YER092W
YER093C
YER093C-A
YER094C
YER095W
YER096W
YER097W
YER098W
YER099C
YER100W
YER101C
YER102W
YER103W
YER104W
YER105C
YER106W
YER107C
YER107W-A
YER109C
YER110C
YER111C
YER112W
YER113C
YER114C
YER115C
YER116C
YER117W
YER118C
YER119C
YER119C-A
YER120W
YER121W
YER122C
YER123W
YER124C
YER125W
YER126C
YER127W
YER128W
YER129W
YER130C
YER131W
YER132C
YER133W
YER133W-A
YER134C
YER135C
YER136W
YER137C
YER137W-A
YER138C
YER138W-A
YER139C
YER140W
YER141W
YER142C
YER143W
YER144C
YER145C
YER145C-A
YER146W
YER147C
YER147C-A
YER148W
YER148W-A
YER149C
YER150W
YER151C
YER152C
YER152W-A
YER153C
YER154W
YER155C
YER156C
YER157W
YER158C
YER158W-A
YER159C
YER160C
YER161C
YER162C
YER163C
YER164W
YER165C-A
YER165W
YER166W
YER167W
YER168C
YER169W
YER170W
YER171W
YER172C
YER172C-A
YER173W
YER174C
YER175C
YER176W
YER177W
YER178W
YER179W
YER180C
YER180C-A
YER182W
YER183C
YER184C
YER185W
YER186C
YER187W
YER188C-A
YER188W
YER189W
YER190W
YFL001W
YFL002C
YFL003C
YFL004W
YFL005W
YFL007W
YFL008W
YFL009W
YFL010C
YFL010W-A
YFL011W
YFL012W
YFL013C
YFL013W-A
YFL014W
YFL016C
YFL017C
YFL017W-A
YFL018C
YFL019C
YFL020C
YFL021C-A
YFL021W
YFL022C
YFL023W
YFL024C
YFL025C
YFL026W
YFL027C
YFL028C
YFL029C
YFL030W
YFL031C-A
YFL031W
YFL032W
YFL033C
YFL034C-A
YFL034C-B
YFL034W
YFL036W
YFL037W
YFL038C
YFL039C
YFL040W
YFL041W
YFL041W-A
YFL042C
YFL044C
YFL045C
YFL046W
YFL047W
YFL048C
YFL049W
YFL050C
YFL051C
YFL052W
YFL053W
YFL054C
YFL055W
YFL056C
YFL057C
YFL058W
YFL062W
YFL066C
YFL067W
YFR001W
YFR002W
YFR003C
YFR004W
YFR005C
YFR006W
YFR007W
YFR008W
YFR009W
YFR010W
YFR010W-A
YFR011C
YFR012W
YFR013W
YFR014C
YFR015C
YFR016C
YFR017C
YFR018C
YFR019W
YFR020W
YFR021W
YFR022W
YFR023W
YFR024C-A
YFR025C
YFR026C
YFR027W
YFR028C
YFR029W
YFR030W
YFR031C
YFR031C-A
YFR032C
YFR032C-A
YFR032C-B
YFR033C
YFR034C
YFR035C
YFR036W
YFR036W-A
YFR037C
YFR038W
YFR039C
YFR040W
YFR041C
YFR042W
YFR043C
YFR044C
YFR045W
YFR046C
YFR047C
YFR048W
YFR049W
YFR050C
YFR051C
YFR052C-A
YFR052W
YFR053C
YFR054C
YFR055W
YFR056C
YGL001C
YGL002W
YGL003C
YGL004C
YGL005C
[truncated: 4,238 more rows]
